# Supplementary material for: Novel genes dramatically alter regulatory network topology in amphioxus
Source: PubMed Central journal article supplement (PMC2575513; doi:10.1186/gb-2008-9-8-r123), 2008-08-04
Supplement: gb-2008-9-8-r123-S1.pdf [file gb-2008-9-8-r123-S1.pdf]

**Additional Table 1. List of TIR domain containing sequences in different genomes**

| <b>Genome</b>                     | <b>Data Source</b>                | <b>Protein Identifier</b> |
|-----------------------------------|-----------------------------------|---------------------------|
| <i>H. sapiens</i> (human)         | Ensembl release 38 'pep.abinitio' | GENSCAN00000006442        |
|                                   | Ensembl release 38 'pep.abinitio' | GENSCAN00000006563        |
|                                   | Ensembl release 38 'pep.abinitio' | GENSCAN00000006564        |
|                                   | Ensembl release 38 'pep.abinitio' | GENSCAN00000007356        |
|                                   | Ensembl release 38 'pep.abinitio' | GENSCAN000000014110       |
|                                   | Ensembl release 38 'pep.abinitio' | GENSCAN000000016770       |
|                                   | Ensembl release 38 'pep.abinitio' | GENSCAN000000023836       |
|                                   | Ensembl release 38 'pep.abinitio' | GENSCAN000000026205       |
|                                   | Ensembl release 38 'pep.abinitio' | GENSCAN000000026337       |
|                                   | Ensembl release 38 'pep.abinitio' | GENSCAN000000026341       |
|                                   | Ensembl release 38 'pep.abinitio' | GENSCAN000000032006       |
|                                   | Ensembl release 38 'pep.abinitio' | GENSCAN000000032010       |
|                                   | Ensembl release 38 'pep.abinitio' | GENSCAN000000034144       |
|                                   | Ensembl release 38 'pep.abinitio' | GENSCAN000000034623       |
|                                   | Ensembl release 38 'pep.abinitio' | GENSCAN000000040296       |
|                                   | Ensembl release 38 'pep.abinitio' | GENSCAN000000046730       |
|                                   | Ensembl release 38 'pep.abinitio' | GENSCAN000000051721       |
|                                   | Ensembl release 38 'pep.abinitio' | GENSCAN000000052592       |
|                                   | Ensembl release 38 'pep.abinitio' | GENSCAN000000057266       |
|                                   | Ensembl release 38 'pep.abinitio' | GENSCAN000000058482       |
| Ensembl release 38 'pep.abinitio' | GENSCAN000000066012               |                           |
| Ensembl release 38 'pep.abinitio' | GENSCAN000000050507               |                           |
| Ensembl release 38 'pep.abinitio' | GENSCAN000000052380               |                           |
| <i>H. sapiens</i> (human)         | Ensembl release 38 'pep'          | ENSP00000003834           |
|                                   | Ensembl release 38 'pep'          | ENSP000000072516          |
|                                   | Ensembl release 38 'pep'          | ENSP000000233946          |
|                                   | Ensembl release 38 'pep'          | ENSP000000233954          |
|                                   | Ensembl release 38 'pep'          | ENSP000000233957          |
|                                   | Ensembl release 38 'pep'          | ENSP000000260010          |
|                                   | Ensembl release 38 'pep'          | ENSP000000264257          |
|                                   | Ensembl release 38 'pep'          | ENSP000000264260          |
|                                   | Ensembl release 38 'pep'          | ENSP000000279992          |
|                                   | Ensembl release 38 'pep'          | ENSP000000296795          |
|                                   | Ensembl release 38 'pep'          | ENSP000000305200          |
|                                   | Ensembl release 38 'pep'          | ENSP000000308925          |
|                                   | Ensembl release 38 'pep'          | ENSP000000309253          |
|                                   | Ensembl release 38 'pep'          | ENSP000000311174          |
|                                   | Ensembl release 38 'pep'          | ENSP000000323890          |
| Ensembl release 38 'pep'          | ENSP000000339832                  |                           |

|                            |                                   |                     |
|----------------------------|-----------------------------------|---------------------|
|                            | Ensembl release 38 'pep'          | ENSP00000340089     |
|                            | Ensembl release 38 'pep'          | ENSP00000344347     |
|                            | Ensembl release 38 'pep'          | ENSP00000344976     |
|                            | Ensembl release 38 'pep'          | ENSP00000348619     |
|                            | Ensembl release 38 'pep'          | ENSP00000349736     |
|                            | Ensembl release 38 'pep'          | ENSP00000354932     |
|                            | Ensembl release 38 'pep'          | ENSP00000370028     |
|                            | Ensembl release 38 'pep'          | ENSP00000371960     |
| <hr/>                      |                                   |                     |
| <i>H. sapiens</i> (human)  | Swiss-Prot                        | P14778 IL1R1_HUMAN  |
|                            | Swiss-Prot                        | Q9NPH3 IL1AP_HUMAN  |
|                            | Swiss-Prot                        | Q13478 IL18R_HUMAN  |
|                            | Swiss-Prot                        | O95256 I18RA_HUMAN  |
|                            | Swiss-Prot                        | Q01638 ILRL1_HUMAN  |
|                            | Swiss-Prot                        | Q9HB29 ILRL2_HUMAN  |
|                            | Swiss-Prot                        | Q9NZN1 IRPL1_HUMAN  |
|                            | Swiss-Prot                        | Q9NP60 IRPL2_HUMAN  |
|                            | Swiss-Prot                        | Q61A17 SIGIR_HUMAN  |
|                            | Swiss-Prot                        | Q15399 TLR1_HUMAN   |
|                            | Swiss-Prot                        | O60603 TLR2_HUMAN   |
|                            | Swiss-Prot                        | O15455 TLR3_HUMAN   |
|                            | Swiss-Prot                        | O00206 TLR4_HUMAN   |
|                            | Swiss-Prot                        | O60602 TLR5_HUMAN   |
|                            | Swiss-Prot                        | Q9Y2C9 TLR6_HUMAN   |
|                            | Swiss-Prot                        | Q9NYK1 TLR7_HUMAN   |
|                            | Swiss-Prot                        | Q9NR97 TLR8_HUMAN   |
|                            | Swiss-Prot                        | Q9NR96 TLR9_HUMAN   |
|                            | Swiss-Prot                        | Q9BXR5 TLR10_HUMAN  |
|                            | Swiss-Prot                        | Q99836 MYD88_HUMAN  |
|                            | TrEMBL                            | Q8IUC6 Q8IUC6_HUMAN |
|                            | TrEMBL                            | Q86XR7 Q86XR7_HUMAN |
|                            | Swiss-Prot                        | P58753 TIRAP_HUMAN  |
|                            | Swiss-Prot                        | Q6SZW1 SARM1_HUMAN  |
| <hr/>                      |                                   |                     |
| <i>M. musculus</i> (mouse) | Ensembl release 38 'pep.abinitio' | GENSCAN00000153036  |
|                            | Ensembl release 38 'pep.abinitio' | GENSCAN00000155466  |
|                            | Ensembl release 38 'pep.abinitio' | GENSCAN00000157254  |
|                            | Ensembl release 38 'pep.abinitio' | GENSCAN00000159308  |
|                            | Ensembl release 38 'pep.abinitio' | GENSCAN00000161585  |
|                            | Ensembl release 38 'pep.abinitio' | GENSCAN00000162981  |
|                            | Ensembl release 38 'pep.abinitio' | GENSCAN00000173273  |
|                            | Ensembl release 38 'pep.abinitio' | GENSCAN00000173275  |
|                            | Ensembl release 38 'pep.abinitio' | GENSCAN00000175431  |
|                            | Ensembl release 38 'pep.abinitio' | GENSCAN00000175918  |
|                            | Ensembl release 38 'pep.abinitio' | GENSCAN00000184846  |

|                            |                                   |                    |
|----------------------------|-----------------------------------|--------------------|
|                            | Ensembl release 38 'pep.abinitio' | GENSCAN00000187775 |
|                            | Ensembl release 38 'pep.abinitio' | GENSCAN00000197386 |
|                            | Ensembl release 38 'pep.abinitio' | GENSCAN00000209084 |
|                            | Ensembl release 38 'pep.abinitio' | GENSCAN00000214191 |
|                            | Ensembl release 38 'pep.abinitio' | GENSCAN00000214924 |
|                            | Ensembl release 38 'pep.abinitio' | GENSCAN00000217755 |
|                            | Ensembl release 38 'pep.abinitio' | GENSCAN00000218141 |
|                            | Ensembl release 38 'pep.abinitio' | GENSCAN00000218146 |
|                            | Ensembl release 38 'pep.abinitio' | GENSCAN00000218583 |
|                            | Ensembl release 38 'pep.abinitio' | GENSCAN00000217148 |
|                            | Ensembl release 38 'pep.abinitio' | GENSCAN00000221196 |
| <hr/>                      |                                   |                    |
| <i>M. musculus</i> (mouse) | Ensembl release 38 'pep'          | ENSMUSP00000023156 |
|                            | Ensembl release 38 'pep'          | ENSMUSP00000027237 |
|                            | Ensembl release 38 'pep'          | ENSMUSP00000029623 |
|                            | Ensembl release 38 'pep'          | ENSMUSP00000034056 |
|                            | Ensembl release 38 'pep'          | ENSMUSP00000034540 |
|                            | Ensembl release 38 'pep'          | ENSMUSP00000035092 |
|                            | Ensembl release 38 'pep'          | ENSMUSP00000036762 |
|                            | Ensembl release 38 'pep'          | ENSMUSP00000043101 |
|                            | Ensembl release 38 'pep'          | ENSMUSP00000045770 |
|                            | Ensembl release 38 'pep'          | ENSMUSP00000051059 |
|                            | Ensembl release 38 'pep'          | ENSMUSP00000054914 |
|                            | Ensembl release 38 'pep'          | ENSMUSP00000057529 |
|                            | Ensembl release 38 'pep'          | ENSMUSP00000060793 |
|                            | Ensembl release 38 'pep'          | ENSMUSP00000061853 |
|                            | Ensembl release 38 'pep'          | ENSMUSP00000062096 |
|                            | Ensembl release 38 'pep'          | ENSMUSP00000066239 |
|                            | Ensembl release 38 'pep'          | ENSMUSP00000068906 |
|                            | Ensembl release 38 'pep'          | ENSMUSP00000074381 |
|                            | Ensembl release 38 'pep'          | ENSMUSP00000074917 |
|                            | Ensembl release 38 'pep'          | ENSMUSP00000077915 |
|                            | Ensembl release 38 'pep'          | ENSMUSP00000082207 |
|                            | Ensembl release 38 'pep'          | ENSMUSP00000085298 |
|                            | Ensembl release 38 'pep'          | ENSMUSP00000085305 |
|                            | Ensembl release 38 'pep'          | ENSMUSP00000092629 |
| <hr/>                      |                                   |                    |
| <i>C. familiaris</i> (dog) | Ensembl release 38 'pep.abinitio' | GENSCAN00000000432 |
|                            | Ensembl release 38 'pep.abinitio' | GENSCAN00000003693 |
|                            | Ensembl release 38 'pep.abinitio' | GENSCAN00000012336 |
|                            | Ensembl release 38 'pep.abinitio' | GENSCAN00000012678 |
|                            | Ensembl release 38 'pep.abinitio' | GENSCAN00000012892 |
|                            | Ensembl release 38 'pep.abinitio' | GENSCAN00000018400 |
|                            | Ensembl release 38 'pep.abinitio' | GENSCAN00000019922 |

|                            |                                   |                    |
|----------------------------|-----------------------------------|--------------------|
|                            | Ensembl release 38 'pep.abinitio' | GENSCAN00000020531 |
|                            | Ensembl release 38 'pep.abinitio' | GENSCAN00000020532 |
|                            | Ensembl release 38 'pep.abinitio' | GENSCAN00000020533 |
|                            | Ensembl release 38 'pep.abinitio' | GENSCAN00000026555 |
|                            | Ensembl release 38 'pep.abinitio' | GENSCAN00000026999 |
|                            | Ensembl release 38 'pep.abinitio' | GENSCAN00000037852 |
|                            | Ensembl release 38 'pep.abinitio' | GENSCAN00000043592 |
|                            | Ensembl release 38 'pep.abinitio' | GENSCAN00000046789 |
|                            | Ensembl release 38 'pep.abinitio' | GENSCAN00000051228 |
|                            | Ensembl release 38 'pep.abinitio' | GENSCAN00000052684 |
|                            | Ensembl release 38 'pep.abinitio' | GENSCAN00000052686 |
|                            | Ensembl release 38 'pep.abinitio' | GENSCAN00000056053 |
|                            | Ensembl release 38 'pep.abinitio' | GENSCAN00000058584 |
|                            | Ensembl release 38 'pep.abinitio' | GENSCAN00000072074 |
|                            | Ensembl release 38 'pep.abinitio' | GENSCAN00000072075 |
|                            | Ensembl release 38 'pep.abinitio' | GENSCAN00000073119 |
|                            | Ensembl release 38 'pep.abinitio' | GENSCAN00000038012 |
|                            | Ensembl release 38 'pep.abinitio' | GENSCAN00000060453 |
| <hr/>                      |                                   |                    |
| <i>C. familiaris</i> (dog) | Ensembl release 38 'pep'          | ENSCAFP0000000299  |
|                            | Ensembl release 38 'pep'          | ENSCAFP00000003121 |
|                            | Ensembl release 38 'pep'          | ENSCAFP00000003126 |
|                            | Ensembl release 38 'pep'          | ENSCAFP00000003131 |
|                            | Ensembl release 38 'pep'          | ENSCAFP00000003133 |
|                            | Ensembl release 38 'pep'          | ENSCAFP00000003138 |
|                            | Ensembl release 38 'pep'          | ENSCAFP00000007387 |
|                            | Ensembl release 38 'pep'          | ENSCAFP00000009741 |
|                            | Ensembl release 38 'pep'          | ENSCAFP00000011004 |
|                            | Ensembl release 38 'pep'          | ENSCAFP00000012269 |
|                            | Ensembl release 38 'pep'          | ENSCAFP00000015327 |
|                            | Ensembl release 38 'pep'          | ENSCAFP00000016726 |
|                            | Ensembl release 38 'pep'          | ENSCAFP00000017193 |
|                            | Ensembl release 38 'pep'          | ENSCAFP00000020084 |
|                            | Ensembl release 38 'pep'          | ENSCAFP00000020679 |
|                            | Ensembl release 38 'pep'          | ENSCAFP00000023836 |
|                            | Ensembl release 38 'pep'          | ENSCAFP00000023840 |
|                            | Ensembl release 38 'pep'          | ENSCAFP00000026353 |
|                            | Ensembl release 38 'pep'          | ENSCAFP00000027553 |
| <hr/>                      |                                   |                    |
| <i>G. gallus</i> (chicken) | Ensembl release 38 'pep.abinitio' | GENSCAN00000000677 |
|                            | Ensembl release 38 'pep.abinitio' | GENSCAN00000006545 |
|                            | Ensembl release 38 'pep.abinitio' | GENSCAN00000006765 |
|                            | Ensembl release 38 'pep.abinitio' | GENSCAN00000008344 |
|                            | Ensembl release 38 'pep.abinitio' | GENSCAN00000010251 |

|                            |                                   |                    |
|----------------------------|-----------------------------------|--------------------|
|                            | Ensembl release 38 'pep.abinitio' | GENSCAN00000010939 |
|                            | Ensembl release 38 'pep.abinitio' | GENSCAN00000019500 |
|                            | Ensembl release 38 'pep.abinitio' | GENSCAN00000020129 |
|                            | Ensembl release 38 'pep.abinitio' | GENSCAN00000021514 |
|                            | Ensembl release 38 'pep.abinitio' | GENSCAN00000021594 |
|                            | Ensembl release 38 'pep.abinitio' | GENSCAN00000023012 |
|                            | Ensembl release 38 'pep.abinitio' | GENSCAN00000023251 |
|                            | Ensembl release 38 'pep.abinitio' | GENSCAN00000023581 |
|                            | Ensembl release 38 'pep.abinitio' | GENSCAN00000024545 |
|                            | Ensembl release 38 'pep.abinitio' | GENSCAN00000025123 |
|                            | Ensembl release 38 'pep.abinitio' | GENSCAN00000029580 |
|                            | Ensembl release 38 'pep.abinitio' | GENSCAN00000034556 |
|                            | Ensembl release 38 'pep.abinitio' | GENSCAN00000044254 |
|                            | Ensembl release 38 'pep.abinitio' | GENSCAN00000046216 |
|                            | Ensembl release 38 'pep.abinitio' | GENSCAN00000050319 |
|                            | Ensembl release 38 'pep.abinitio' | GENSCAN00000054052 |
|                            | Ensembl release 38 'pep.abinitio' | GENSCAN00000057832 |
|                            | Ensembl release 38 'pep.abinitio' | GENSCAN00000057834 |
|                            | Ensembl release 38 'pep.abinitio' | GENSCAN00000065494 |
|                            | Ensembl release 38 'pep.abinitio' | GENSCAN00000070507 |
|                            | Ensembl release 38 'pep.abinitio' | GENSCAN00000018661 |
|                            | Ensembl release 38 'pep.abinitio' | GENSCAN00000075100 |
| <hr/>                      |                                   |                    |
| <i>G. gallus</i> (chicken) | Ensembl release 38 'pep'          | ENSGALP00000001118 |
|                            | Ensembl release 38 'pep'          | ENSGALP00000001610 |
|                            | Ensembl release 38 'pep'          | ENSGALP00000005677 |
|                            | Ensembl release 38 'pep'          | ENSGALP00000006773 |
|                            | Ensembl release 38 'pep'          | ENSGALP00000009551 |
|                            | Ensembl release 38 'pep'          | ENSGALP00000011727 |
|                            | Ensembl release 38 'pep'          | ENSGALP00000013260 |
|                            | Ensembl release 38 'pep'          | ENSGALP00000014431 |
|                            | Ensembl release 38 'pep'          | ENSGALP00000015020 |
|                            | Ensembl release 38 'pep'          | ENSGALP00000015286 |
|                            | Ensembl release 38 'pep'          | ENSGALP00000021914 |
|                            | Ensembl release 38 'pep'          | ENSGALP00000026211 |
|                            | Ensembl release 38 'pep'          | ENSGALP00000026727 |
|                            | Ensembl release 38 'pep'          | ENSGALP00000027049 |
|                            | Ensembl release 38 'pep'          | ENSGALP00000027050 |
|                            | Ensembl release 38 'pep'          | ENSGALP00000027053 |
|                            | Ensembl release 38 'pep'          | ENSGALP00000027055 |
|                            | Ensembl release 38 'pep'          | ENSGALP00000028126 |
|                            | Ensembl release 38 'pep'          | ENSGALP00000029597 |
|                            | Ensembl release 38 'pep'          | ENSGALP00000033864 |

|                                            |                                   |                    |
|--------------------------------------------|-----------------------------------|--------------------|
| <i>X. tropicalis</i> (western clawed frog) | Ensembl release 38 'pep.abinitio' | FGENESH00000100541 |
|                                            | Ensembl release 38 'pep.abinitio' | FGENESH00000109261 |
|                                            | Ensembl release 38 'pep.abinitio' | FGENESH00000109955 |
|                                            | Ensembl release 38 'pep.abinitio' | FGENESH00000117286 |
|                                            | Ensembl release 38 'pep.abinitio' | GENSCAN00000008389 |
|                                            | Ensembl release 38 'pep.abinitio' | GENSCAN00000012275 |
|                                            | Ensembl release 38 'pep.abinitio' | GENSCAN00000014909 |
|                                            | Ensembl release 38 'pep.abinitio' | GENSCAN00000016099 |
|                                            | Ensembl release 38 'pep.abinitio' | GENSCAN00000016118 |
|                                            | Ensembl release 38 'pep.abinitio' | GENSCAN00000031703 |
|                                            | Ensembl release 38 'pep.abinitio' | GENSCAN00000031705 |
|                                            | Ensembl release 38 'pep.abinitio' | GENSCAN00000031706 |
|                                            | Ensembl release 38 'pep.abinitio' | GENSCAN00000034368 |
|                                            | Ensembl release 38 'pep.abinitio' | GENSCAN00000035339 |
|                                            | Ensembl release 38 'pep.abinitio' | GENSCAN00000038838 |
|                                            | Ensembl release 38 'pep.abinitio' | GENSCAN00000043392 |
|                                            | Ensembl release 38 'pep.abinitio' | GENSCAN00000046153 |
|                                            | Ensembl release 38 'pep.abinitio' | GENSCAN00000046203 |
|                                            | Ensembl release 38 'pep.abinitio' | GENSCAN00000048308 |
|                                            | Ensembl release 38 'pep.abinitio' | GENSCAN00000054063 |
|                                            | Ensembl release 38 'pep.abinitio' | GENSCAN00000060523 |
|                                            | Ensembl release 38 'pep.abinitio' | GENSCAN00000062691 |
|                                            | Ensembl release 38 'pep.abinitio' | GENSCAN00000062737 |
|                                            | Ensembl release 38 'pep.abinitio' | GENSCAN00000065633 |
|                                            | Ensembl release 38 'pep.abinitio' | GENSCAN00000068925 |
|                                            | Ensembl release 38 'pep.abinitio' | GENSCAN00000071750 |
|                                            | Ensembl release 38 'pep.abinitio' | GENSCAN00000071764 |
|                                            | Ensembl release 38 'pep.abinitio' | GENSCAN0000008482  |
| <i>X. tropicalis</i> (western clawed frog) | Ensembl release 38 'pep'          | ENSXETP0000003822  |
|                                            | Ensembl release 38 'pep'          | ENSXETP0000009979  |
|                                            | Ensembl release 38 'pep'          | ENSXETP00000011729 |
|                                            | Ensembl release 38 'pep'          | ENSXETP00000012948 |
|                                            | Ensembl release 38 'pep'          | ENSXETP00000012956 |
|                                            | Ensembl release 38 'pep'          | ENSXETP00000032872 |
|                                            | Ensembl release 38 'pep'          | ENSXETP00000032921 |
|                                            | Ensembl release 38 'pep'          | ENSXETP00000033579 |
|                                            | Ensembl release 38 'pep'          | ENSXETP00000038393 |
|                                            | Ensembl release 38 'pep'          | ENSXETP00000038824 |
|                                            | Ensembl release 38 'pep'          | ENSXETP00000039929 |
|                                            | Ensembl release 38 'pep'          | ENSXETP00000047459 |
|                                            | Ensembl release 38 'pep'          | ENSXETP00000047482 |
|                                            | Ensembl release 38 'pep'          | ENSXETP00000055330 |

|                             |                                   |                    |
|-----------------------------|-----------------------------------|--------------------|
|                             | Ensembl release 38 'pep'          | ENSXETP00000056436 |
|                             | Ensembl release 38 'pep'          | ENSXETP00000056762 |
|                             | Ensembl release 38 'pep'          | ENSXETP00000056818 |
|                             | Ensembl release 38 'pep'          | ENSXETP00000057554 |
|                             | Ensembl release 38 'pep'          | ENSXETP00000057560 |
| <i>D. rerio</i> (zebrafish) | Ensembl release 38 'pep.abinitio' | FGENESH00000064811 |
|                             | Ensembl release 38 'pep.abinitio' | FGENESH00000087033 |
|                             | Ensembl release 38 'pep.abinitio' | GENSCAN00000001002 |
|                             | Ensembl release 38 'pep.abinitio' | GENSCAN00000004216 |
|                             | Ensembl release 38 'pep.abinitio' | GENSCAN00000004226 |
|                             | Ensembl release 38 'pep.abinitio' | GENSCAN00000009227 |
|                             | Ensembl release 38 'pep.abinitio' | GENSCAN00000009229 |
|                             | Ensembl release 38 'pep.abinitio' | GENSCAN00000009235 |
|                             | Ensembl release 38 'pep.abinitio' | GENSCAN00000010689 |
|                             | Ensembl release 38 'pep.abinitio' | GENSCAN00000012176 |
|                             | Ensembl release 38 'pep.abinitio' | GENSCAN00000013713 |
|                             | Ensembl release 38 'pep.abinitio' | GENSCAN00000014011 |
|                             | Ensembl release 38 'pep.abinitio' | GENSCAN00000014752 |
|                             | Ensembl release 38 'pep.abinitio' | GENSCAN00000014769 |
|                             | Ensembl release 38 'pep.abinitio' | GENSCAN00000015669 |
|                             | Ensembl release 38 'pep.abinitio' | GENSCAN00000017287 |
|                             | Ensembl release 38 'pep.abinitio' | GENSCAN00000023308 |
|                             | Ensembl release 38 'pep.abinitio' | GENSCAN00000024449 |
|                             | Ensembl release 38 'pep.abinitio' | GENSCAN00000024873 |
|                             | Ensembl release 38 'pep.abinitio' | GENSCAN00000026388 |
|                             | Ensembl release 38 'pep.abinitio' | GENSCAN00000027324 |
|                             | Ensembl release 38 'pep.abinitio' | GENSCAN00000028655 |
|                             | Ensembl release 38 'pep.abinitio' | GENSCAN00000036588 |
|                             | Ensembl release 38 'pep.abinitio' | GENSCAN00000037261 |
|                             | Ensembl release 38 'pep.abinitio' | GENSCAN00000037282 |
|                             | Ensembl release 38 'pep.abinitio' | GENSCAN00000043194 |
|                             | Ensembl release 38 'pep.abinitio' | GENSCAN00000043195 |
|                             | Ensembl release 38 'pep.abinitio' | GENSCAN00000043329 |
|                             | Ensembl release 38 'pep.abinitio' | GENSCAN00000047098 |
| <i>D. rerio</i> (zebrafish) | Ensembl release 38 'pep'          | ENSDARP00000014779 |
|                             | Ensembl release 38 'pep'          | ENSDARP00000015475 |
|                             | Ensembl release 38 'pep'          | ENSDARP00000020711 |
|                             | Ensembl release 38 'pep'          | ENSDARP00000028819 |
|                             | Ensembl release 38 'pep'          | ENSDARP00000033635 |
|                             | Ensembl release 38 'pep'          | ENSDARP00000036558 |
|                             | Ensembl release 38 'pep'          | ENSDARP00000049952 |
|                             | Ensembl release 38 'pep'          | ENSDARP00000052310 |

|                                             |                                   |                          |
|---------------------------------------------|-----------------------------------|--------------------------|
|                                             | Ensembl release 38 'pep'          | ENSDARP00000054686       |
|                                             | Ensembl release 38 'pep'          | ENSDARP00000055005       |
|                                             | Ensembl release 38 'pep'          | ENSDARP00000055023       |
|                                             | Ensembl release 38 'pep'          | ENSDARP00000055139       |
|                                             | Ensembl release 38 'pep'          | ENSDARP00000055953       |
|                                             | Ensembl release 38 'pep'          | ENSDARP00000060141       |
|                                             | Ensembl release 38 'pep'          | ENSDARP00000060154       |
|                                             | Ensembl release 38 'pep'          | ENSDARP00000060260       |
|                                             | Ensembl release 38 'pep'          | ENSDARP00000060334       |
|                                             | Ensembl release 38 'pep'          | ENSDARP00000060336       |
|                                             | Ensembl release 38 'pep'          | ENSDARP00000063175       |
|                                             | Ensembl release 38 'pep'          | ENSDARP00000065175       |
|                                             | Ensembl release 38 'pep'          | ENSDARP00000065228       |
|                                             | Ensembl release 38 'pep'          | ENSDARP00000065229       |
|                                             | Ensembl release 38 'pep'          | ENSDARP00000065339       |
| <hr/>                                       |                                   |                          |
| <i>F. rubripes</i> (Japanese pufferfish)    | Ensembl release 38 'pep.abinitio' | GENSCANSLICE00000000270  |
|                                             | Ensembl release 38 'pep.abinitio' | GENSCANSLICE000000008960 |
|                                             | Ensembl release 38 'pep.abinitio' | GENSCANSLICE00000010582  |
|                                             | Ensembl release 38 'pep.abinitio' | GENSCANSLICE00000011064  |
|                                             | Ensembl release 38 'pep.abinitio' | GENSCANSLICE00000013973  |
|                                             | Ensembl release 38 'pep.abinitio' | GENSCANSLICE00000015159  |
|                                             | Ensembl release 38 'pep.abinitio' | GENSCANSLICE00000015886  |
|                                             | Ensembl release 38 'pep.abinitio' | GENSCANSLICE00000016442  |
|                                             | Ensembl release 38 'pep.abinitio' | GENSCANSLICE00000018187  |
|                                             | Ensembl release 38 'pep.abinitio' | GENSCANSLICE00000018608  |
|                                             | Ensembl release 38 'pep.abinitio' | GENSCANSLICE00000019619  |
|                                             | Ensembl release 38 'pep.abinitio' | GENSCANSLICE00000019966  |
|                                             | Ensembl release 38 'pep.abinitio' | GENSCANSLICE00000020185  |
|                                             | Ensembl release 38 'pep.abinitio' | GENSCANSLICE00000020705  |
|                                             | Ensembl release 38 'pep.abinitio' | GENSCANSLICE00000025925  |
|                                             | Ensembl release 38 'pep.abinitio' | GENSCANSLICE00000006602  |
| <hr style="border-top: 1px dashed black;"/> |                                   |                          |
| <i>F. rubripes</i> (Japanese pufferfish)    | Ensembl release 38 'pep'          | NEWSINFRUP00000131291    |
|                                             | Ensembl release 38 'pep'          | NEWSINFRUP00000131701    |
|                                             | Ensembl release 38 'pep'          | NEWSINFRUP00000135045    |
|                                             | Ensembl release 38 'pep'          | NEWSINFRUP00000138215    |
|                                             | Ensembl release 38 'pep'          | NEWSINFRUP00000138634    |
|                                             | Ensembl release 38 'pep'          | NEWSINFRUP00000143580    |
|                                             | Ensembl release 38 'pep'          | NEWSINFRUP00000144019    |
|                                             | Ensembl release 38 'pep'          | NEWSINFRUP00000146386    |
|                                             | Ensembl release 38 'pep'          | NEWSINFRUP00000147061    |
|                                             | Ensembl release 38 'pep'          | NEWSINFRUP00000157320    |
|                                             | Ensembl release 38 'pep'          | NEWSINFRUP00000163648    |



|                                           |                                   |                       |
|-------------------------------------------|-----------------------------------|-----------------------|
|                                           | Ensembl release 38 'pep'          | NEWSINFRUP00000167618 |
|                                           | Ensembl release 38 'pep'          | NEWSINFRUP00000168556 |
|                                           | Ensembl release 38 'pep'          | NEWSINFRUP00000168996 |
|                                           | Ensembl release 38 'pep'          | NEWSINFRUP00000177377 |
|                                           | Ensembl release 38 'pep'          | NEWSINFRUP00000181961 |
| <hr/>                                     |                                   |                       |
| <i>T. nigroviridis</i> (green pufferfish) | Ensembl release 38 'pep.abinitio' | GIDT00005317001       |
|                                           | Ensembl release 38 'pep.abinitio' | GSCT00004118001       |
|                                           | Ensembl release 38 'pep.abinitio' | GSCT00004170001       |
|                                           | Ensembl release 38 'pep.abinitio' | GSCT00004243001       |
|                                           | Ensembl release 38 'pep.abinitio' | GSCT00004780001       |
|                                           | Ensembl release 38 'pep.abinitio' | GSCT00005162001       |
|                                           | Ensembl release 38 'pep.abinitio' | GSCT00005835001       |
|                                           | Ensembl release 38 'pep.abinitio' | GSCT00008449001       |
|                                           | Ensembl release 38 'pep.abinitio' | GSCT00010961001       |
|                                           | Ensembl release 38 'pep.abinitio' | GSCT00012623001       |
|                                           | Ensembl release 38 'pep.abinitio' | GSCT00012677001       |
|                                           | Ensembl release 38 'pep.abinitio' | GSCT00013311001       |
|                                           | Ensembl release 38 'pep.abinitio' | GSCT00022847001       |
|                                           | Ensembl release 38 'pep.abinitio' | GSCT00026074001       |
|                                           | Ensembl release 38 'pep.abinitio' | GWSHT00009051001      |
|                                           | Ensembl release 38 'pep.abinitio' | GWSHT00010289001      |
|                                           | Ensembl release 38 'pep.abinitio' | GWSST00001947001      |
|                                           | Ensembl release 38 'pep.abinitio' | GWSST00010292001      |
|                                           | Ensembl release 38 'pep.abinitio' | GWSST00001338001      |
|                                           | Ensembl release 38 'pep.abinitio' | GWSST00009038001      |
| <hr/>                                     |                                   |                       |
| <i>T. nigroviridis</i> (green pufferfish) | Ensembl release 38 'pep'          | GSTENP00009678001     |
|                                           | Ensembl release 38 'pep'          | GSTENP00010088001     |
|                                           | Ensembl release 38 'pep'          | GSTENP00011314001     |
|                                           | Ensembl release 38 'pep'          | GSTENP00011330001     |
|                                           | Ensembl release 38 'pep'          | GSTENP00013690001     |
|                                           | Ensembl release 38 'pep'          | GSTENP00015613001     |
|                                           | Ensembl release 38 'pep'          | GSTENP00021168001     |
|                                           | Ensembl release 38 'pep'          | GSTENP00023920001     |
|                                           | Ensembl release 38 'pep'          | GSTENP00025477001     |
|                                           | Ensembl release 38 'pep'          | GSTENP00025576001     |
|                                           | Ensembl release 38 'pep'          | GSTENP00025914001     |
|                                           | Ensembl release 38 'pep'          | GSTENP00026075001     |
|                                           | Ensembl release 38 'pep'          | GSTENP00026551001     |
|                                           | Ensembl release 38 'pep'          | GSTENP00027188001     |
|                                           | Ensembl release 38 'pep'          | GSTENP00027960001     |
|                                           | Ensembl release 38 'pep'          | GSTENP00029184001     |
|                                           | Ensembl release 38 'pep'          | GSTENP00037186001     |

---

|                                |                                        |                                |
|--------------------------------|----------------------------------------|--------------------------------|
| <i>B. floridae</i> (amphioxus) | JGI <i>B. floridae</i> v1.0 annotation | e_gw.1.508.1                   |
|                                | JGI <i>B. floridae</i> v1.0 annotation | e_gw.102.129.1                 |
|                                | JGI <i>B. floridae</i> v1.0 annotation | e_gw.102.131.1                 |
|                                | JGI <i>B. floridae</i> v1.0 annotation | e_gw.102.45.1                  |
|                                | JGI <i>B. floridae</i> v1.0 annotation | e_gw.1052.5.1                  |
|                                | JGI <i>B. floridae</i> v1.0 annotation | e_gw.106.152.1                 |
|                                | JGI <i>B. floridae</i> v1.0 annotation | e_gw.239.19.1                  |
|                                | JGI <i>B. floridae</i> v1.0 annotation | e_gw.242.16.1                  |
|                                | JGI <i>B. floridae</i> v1.0 annotation | e_gw.267.25.1                  |
|                                | JGI <i>B. floridae</i> v1.0 annotation | e_gw.287.27.1                  |
|                                | JGI <i>B. floridae</i> v1.0 annotation | e_gw.344.14.1                  |
|                                | JGI <i>B. floridae</i> v1.0 annotation | e_gw.344.49.1                  |
|                                | JGI <i>B. floridae</i> v1.0 annotation | e_gw.371.22.1                  |
|                                | JGI <i>B. floridae</i> v1.0 annotation | e_gw.39.83.1                   |
|                                | JGI <i>B. floridae</i> v1.0 annotation | e_gw.400.24.1                  |
|                                | JGI <i>B. floridae</i> v1.0 annotation | e_gw.41.211.1                  |
|                                | JGI <i>B. floridae</i> v1.0 annotation | e_gw.41.55.1                   |
|                                | JGI <i>B. floridae</i> v1.0 annotation | e_gw.439.11.1                  |
|                                | JGI <i>B. floridae</i> v1.0 annotation | e_gw.439.14.1                  |
|                                | JGI <i>B. floridae</i> v1.0 annotation | e_gw.47.58.1                   |
|                                | JGI <i>B. floridae</i> v1.0 annotation | e_gw.486.11.1                  |
|                                | JGI <i>B. floridae</i> v1.0 annotation | e_gw.54.171.1                  |
|                                | JGI <i>B. floridae</i> v1.0 annotation | e_gw.54.3.1                    |
|                                | JGI <i>B. floridae</i> v1.0 annotation | e_gw.56.121.1                  |
|                                | JGI <i>B. floridae</i> v1.0 annotation | e_gw.56.214.1                  |
|                                | JGI <i>B. floridae</i> v1.0 annotation | e_gw.639.4.1                   |
|                                | JGI <i>B. floridae</i> v1.0 annotation | e_gw.75.185.1                  |
|                                | JGI <i>B. floridae</i> v1.0 annotation | e_gw.75.188.1                  |
|                                | JGI <i>B. floridae</i> v1.0 annotation | e_gw.75.189.1                  |
|                                | JGI <i>B. floridae</i> v1.0 annotation | e_gw.75.190.1                  |
|                                | JGI <i>B. floridae</i> v1.0 annotation | e_gw.75.49.1                   |
|                                | JGI <i>B. floridae</i> v1.0 annotation | e_gw.75.54.1                   |
|                                | JGI <i>B. floridae</i> v1.0 annotation | e_gw.767.15.1                  |
|                                | JGI <i>B. floridae</i> v1.0 annotation | estExt_fgenes2_pg.C_1850079    |
|                                | JGI <i>B. floridae</i> v1.0 annotation | estExt_fgenes2_pg.C_2060045    |
|                                | JGI <i>B. floridae</i> v1.0 annotation | estExt_fgenes2_pg.C_2140015    |
|                                | JGI <i>B. floridae</i> v1.0 annotation | estExt_fgenes2_pg.C_750028     |
|                                | JGI <i>B. floridae</i> v1.0 annotation | fgenes2_pg.scaffold_1000237    |
|                                | JGI <i>B. floridae</i> v1.0 annotation | fgenes2_pg.scaffold_114000017  |
|                                | JGI <i>B. floridae</i> v1.0 annotation | fgenes2_pg.scaffold_134000033  |
|                                | JGI <i>B. floridae</i> v1.0 annotation | fgenes2_pg.scaffold_144000044  |
|                                | JGI <i>B. floridae</i> v1.0 annotation | fgenes2_pg.scaffold_1466000001 |
|                                | JGI <i>B. floridae</i> v1.0 annotation | fgenes2_pg.scaffold_163000047  |

|                                        |                               |
|----------------------------------------|-------------------------------|
| JGI <i>B. floridae</i> v1.0 annotation | fgenes2_pg.scaffold_163000048 |
| JGI <i>B. floridae</i> v1.0 annotation | fgenes2_pg.scaffold_163000054 |
| JGI <i>B. floridae</i> v1.0 annotation | fgenes2_pg.scaffold_163000065 |
| JGI <i>B. floridae</i> v1.0 annotation | fgenes2_pg.scaffold_174000015 |
| JGI <i>B. floridae</i> v1.0 annotation | fgenes2_pg.scaffold_175000015 |
| JGI <i>B. floridae</i> v1.0 annotation | fgenes2_pg.scaffold_177000008 |
| JGI <i>B. floridae</i> v1.0 annotation | fgenes2_pg.scaffold_18000081  |
| JGI <i>B. floridae</i> v1.0 annotation | fgenes2_pg.scaffold_18000082  |
| JGI <i>B. floridae</i> v1.0 annotation | fgenes2_pg.scaffold_18000083  |
| JGI <i>B. floridae</i> v1.0 annotation | fgenes2_pg.scaffold_187000032 |
| JGI <i>B. floridae</i> v1.0 annotation | fgenes2_pg.scaffold_187000033 |
| JGI <i>B. floridae</i> v1.0 annotation | fgenes2_pg.scaffold_187000076 |
| JGI <i>B. floridae</i> v1.0 annotation | fgenes2_pg.scaffold_187000078 |
| JGI <i>B. floridae</i> v1.0 annotation | fgenes2_pg.scaffold_187000079 |
| JGI <i>B. floridae</i> v1.0 annotation | fgenes2_pg.scaffold_188000027 |
| JGI <i>B. floridae</i> v1.0 annotation | fgenes2_pg.scaffold_189000035 |
| JGI <i>B. floridae</i> v1.0 annotation | fgenes2_pg.scaffold_19000069  |
| JGI <i>B. floridae</i> v1.0 annotation | fgenes2_pg.scaffold_19000170  |
| JGI <i>B. floridae</i> v1.0 annotation | fgenes2_pg.scaffold_2000287   |
| JGI <i>B. floridae</i> v1.0 annotation | fgenes2_pg.scaffold_206000046 |
| JGI <i>B. floridae</i> v1.0 annotation | fgenes2_pg.scaffold_213000033 |
| JGI <i>B. floridae</i> v1.0 annotation | fgenes2_pg.scaffold_22000045  |
| JGI <i>B. floridae</i> v1.0 annotation | fgenes2_pg.scaffold_22000061  |
| JGI <i>B. floridae</i> v1.0 annotation | fgenes2_pg.scaffold_230000024 |
| JGI <i>B. floridae</i> v1.0 annotation | fgenes2_pg.scaffold_255000034 |
| JGI <i>B. floridae</i> v1.0 annotation | fgenes2_pg.scaffold_287000037 |
| JGI <i>B. floridae</i> v1.0 annotation | fgenes2_pg.scaffold_334000015 |
| JGI <i>B. floridae</i> v1.0 annotation | fgenes2_pg.scaffold_361000032 |
| JGI <i>B. floridae</i> v1.0 annotation | fgenes2_pg.scaffold_366000022 |
| JGI <i>B. floridae</i> v1.0 annotation | fgenes2_pg.scaffold_401000022 |
| JGI <i>B. floridae</i> v1.0 annotation | fgenes2_pg.scaffold_43000097  |
| JGI <i>B. floridae</i> v1.0 annotation | fgenes2_pg.scaffold_48000071  |
| JGI <i>B. floridae</i> v1.0 annotation | fgenes2_pg.scaffold_489000023 |
| JGI <i>B. floridae</i> v1.0 annotation | fgenes2_pg.scaffold_61000179  |
| JGI <i>B. floridae</i> v1.0 annotation | fgenes2_pg.scaffold_7000217   |
| JGI <i>B. floridae</i> v1.0 annotation | fgenes2_pg.scaffold_75000003  |
| JGI <i>B. floridae</i> v1.0 annotation | fgenes2_pg.scaffold_76000029  |
| JGI <i>B. floridae</i> v1.0 annotation | fgenes2_pg.scaffold_90000004  |
| JGI <i>B. floridae</i> v1.0 annotation | fgenes2_pm.scaffold_18000015  |
| JGI <i>B. floridae</i> v1.0 annotation | fgenes2_pm.scaffold_356000002 |
| JGI <i>B. floridae</i> v1.0 annotation | gw.102.43.1                   |
| JGI <i>B. floridae</i> v1.0 annotation | gw.106.131.1                  |
| JGI <i>B. floridae</i> v1.0 annotation | gw.106.50.1                   |

|                                        |                               |
|----------------------------------------|-------------------------------|
| JGI <i>B. floridae</i> v1.0 annotation | gw.239.18.1                   |
| JGI <i>B. floridae</i> v1.0 annotation | gw.239.44.1                   |
| JGI <i>B. floridae</i> v1.0 annotation | gw.25.174.1                   |
| JGI <i>B. floridae</i> v1.0 annotation | gw.264.29.1                   |
| JGI <i>B. floridae</i> v1.0 annotation | gw.32.126.1                   |
| JGI <i>B. floridae</i> v1.0 annotation | gw.356.28.1                   |
| JGI <i>B. floridae</i> v1.0 annotation | gw.356.82.1                   |
| JGI <i>B. floridae</i> v1.0 annotation | gw.391.9.1                    |
| JGI <i>B. floridae</i> v1.0 annotation | gw.435.44.1                   |
| JGI <i>B. floridae</i> v1.0 annotation | gw.44.60.1                    |
| JGI <i>B. floridae</i> v1.0 annotation | gw.675.12.1                   |
| JGI <i>B. floridae</i> v1.0 annotation | gw.688.12.1                   |
| JGI <i>B. floridae</i> v1.0 annotation | gw.75.193.1                   |
| JGI <i>B. floridae</i> v1.0 annotation | gw.784.7.1                    |
| JGI <i>B. floridae</i> v1.0 annotation | gw.81.36.1                    |
| JGI <i>B. floridae</i> v1.0 annotation | gw.839.2.1                    |
| JGI <i>B. floridae</i> v1.0 annotation | e_gw.470.10.1                 |
| JGI <i>B. floridae</i> v1.0 annotation | fgenes2_pg.scaffold_130000118 |
| JGI <i>B. floridae</i> v1.0 annotation | fgenes2_pg.scaffold_137000036 |
| JGI <i>B. floridae</i> v1.0 annotation | fgenes2_pg.scaffold_272000001 |
| JGI <i>B. floridae</i> v1.0 annotation | fgenes2_pg.scaffold_126000025 |
| JGI <i>B. floridae</i> v1.0 annotation | e_gw.75.192.1                 |
| JGI <i>B. floridae</i> v1.0 annotation | e_gw.75.60.1                  |
| JGI <i>B. floridae</i> v1.0 annotation | fgenes2_pg.scaffold_73000085  |
| JGI <i>B. floridae</i> v1.0 annotation | fgenes2_pg.scaffold_1000239   |
| JGI <i>B. floridae</i> v1.0 annotation | fgenes2_pg.scaffold_410000011 |
| JGI <i>B. floridae</i> v1.0 annotation | estExt_fgenes2_pg.C_2670041   |
| JGI <i>B. floridae</i> v1.0 annotation | fgenes2_pg.scaffold_235000018 |
| JGI <i>B. floridae</i> v1.0 annotation | e_gw.334.50.1                 |
| JGI <i>B. floridae</i> v1.0 annotation | estExt_fgenes2_pg.C_1340031   |
| JGI <i>B. floridae</i> v1.0 annotation | fgenes2_pg.scaffold_186000038 |
| JGI <i>B. floridae</i> v1.0 annotation | estExt_fgenes2_pg.C_5050026   |
| JGI <i>B. floridae</i> v1.0 annotation | fgenes2_pg.scaffold_122000096 |
| JGI <i>B. floridae</i> v1.0 annotation | fgenes2_pg.scaffold_303000054 |
| JGI <i>B. floridae</i> v1.0 annotation | fgenes2_pg.scaffold_110000023 |
| JGI <i>B. floridae</i> v1.0 annotation | fgenes2_pg.scaffold_599000007 |
| JGI <i>B. floridae</i> v1.0 annotation | e_gw.334.6.1                  |
| JGI <i>B. floridae</i> v1.0 annotation | fgenes2_pg.scaffold_218000013 |
| JGI <i>B. floridae</i> v1.0 annotation | fgenes2_pg.scaffold_170000017 |

---

|                                                                                   |                     |
|-----------------------------------------------------------------------------------|---------------------|
| <i>C. intestinalis</i> (transparent sea squirt) Ensembl release 38 'pep.abinitio' | GENSCAN000000083317 |
| Ensembl release 38 'pep.abinitio'                                                 | GENSCAN000000086824 |
| Ensembl release 38 'pep.abinitio'                                                 | GENSCAN000000100475 |
| Ensembl release 38 'pep.abinitio'                                                 | GENSCAN000000096598 |

| <i>C. intestinalis</i> (transparent sea squirt) Ensembl release 38 'pep' |                                          | ENSCINP00000000241           |
|--------------------------------------------------------------------------|------------------------------------------|------------------------------|
|                                                                          | Ensembl release 38 'pep'                 | ENSCINP00000024401           |
| <i>S. purpuratus</i> (purple sea urchin)                                 | HGSC Spur_v2.0 assembly (gencode result) | Scaffold_v2_10491_gencode_1  |
|                                                                          | HGSC Spur_v2.0 assembly (gencode result) | Scaffold_v2_11325_gencode_2  |
|                                                                          | HGSC Spur_v2.0 assembly (gencode result) | Scaffold_v2_11879_gencode_1  |
|                                                                          | HGSC Spur_v2.0 assembly (gencode result) | Scaffold_v2_12153_gencode_22 |
|                                                                          | HGSC Spur_v2.0 assembly (gencode result) | Scaffold_v2_12153_gencode_19 |
|                                                                          | HGSC Spur_v2.0 assembly (gencode result) | Scaffold_v2_12161_gencode_5  |
|                                                                          | HGSC Spur_v2.0 assembly (gencode result) | Scaffold_v2_12739_gencode_4  |
|                                                                          | HGSC Spur_v2.0 assembly (gencode result) | Scaffold_v2_13740_gencode_4  |
|                                                                          | HGSC Spur_v2.0 assembly (gencode result) | Scaffold_v2_14069_gencode_1  |
|                                                                          | HGSC Spur_v2.0 assembly (gencode result) | Scaffold_v2_14511_gencode_8  |
|                                                                          | HGSC Spur_v2.0 assembly (gencode result) | Scaffold_v2_14513_gencode_14 |
|                                                                          | HGSC Spur_v2.0 assembly (gencode result) | Scaffold_v2_14513_gencode_16 |
|                                                                          | HGSC Spur_v2.0 assembly (gencode result) | Scaffold_v2_15422_gencode_1  |
|                                                                          | HGSC Spur_v2.0 assembly (gencode result) | Scaffold_v2_15453_gencode_3  |
|                                                                          | HGSC Spur_v2.0 assembly (gencode result) | Scaffold_v2_15454_gencode_13 |
|                                                                          | HGSC Spur_v2.0 assembly (gencode result) | Scaffold_v2_15504_gencode_2  |
|                                                                          | HGSC Spur_v2.0 assembly (gencode result) | Scaffold_v2_15504_gencode_3  |
|                                                                          | HGSC Spur_v2.0 assembly (gencode result) | Scaffold_v2_15523_gencode_2  |
|                                                                          | HGSC Spur_v2.0 assembly (gencode result) | Scaffold_v2_15579_gencode_1  |
|                                                                          | HGSC Spur_v2.0 assembly (gencode result) | Scaffold_v2_16324_gencode_5  |
|                                                                          | HGSC Spur_v2.0 assembly (gencode result) | Scaffold_v2_16931_gencode_1  |
|                                                                          | HGSC Spur_v2.0 assembly (gencode result) | Scaffold_v2_17238_gencode_2  |
|                                                                          | HGSC Spur_v2.0 assembly (gencode result) | Scaffold_v2_17883_gencode_1  |
|                                                                          | HGSC Spur_v2.0 assembly (gencode result) | Scaffold_v2_17907_gencode_1  |
|                                                                          | HGSC Spur_v2.0 assembly (gencode result) | Scaffold_v2_18026_gencode_3  |
|                                                                          | HGSC Spur_v2.0 assembly (gencode result) | Scaffold_v2_18121_gencode_2  |
|                                                                          | HGSC Spur_v2.0 assembly (gencode result) | Scaffold_v2_18964_gencode_21 |
|                                                                          | HGSC Spur_v2.0 assembly (gencode result) | Scaffold_v2_18964_gencode_23 |
|                                                                          | HGSC Spur_v2.0 assembly (gencode result) | Scaffold_v2_18964_gencode_25 |
|                                                                          | HGSC Spur_v2.0 assembly (gencode result) | Scaffold_v2_19932_gencode_3  |
|                                                                          | HGSC Spur_v2.0 assembly (gencode result) | Scaffold_v2_19973_gencode_2  |
|                                                                          | HGSC Spur_v2.0 assembly (gencode result) | Scaffold_v2_21540_gencode_2  |
|                                                                          | HGSC Spur_v2.0 assembly (gencode result) | Scaffold_v2_21540_gencode_3  |
|                                                                          | HGSC Spur_v2.0 assembly (gencode result) | Scaffold_v2_21551_gencode_2  |
|                                                                          | HGSC Spur_v2.0 assembly (gencode result) | Scaffold_v2_22311_gencode_2  |
|                                                                          | HGSC Spur_v2.0 assembly (gencode result) | Scaffold_v2_22311_gencode_3  |
|                                                                          | HGSC Spur_v2.0 assembly (gencode result) | Scaffold_v2_22311_gencode_4  |
|                                                                          | HGSC Spur_v2.0 assembly (gencode result) | Scaffold_v2_22325_gencode_2  |
| HGSC Spur_v2.0 assembly (gencode result)                                 | Scaffold_v2_22325_gencode_3              |                              |
| HGSC Spur_v2.0 assembly (gencode result)                                 | Scaffold_v2_23011_gencode_3              |                              |

|                                          |                              |
|------------------------------------------|------------------------------|
| HGSC Spur_v2.0 assembly (gencode result) | Scaffold_v2_2331_gencode_2   |
| HGSC Spur_v2.0 assembly (gencode result) | Scaffold_v2_2339_gencode_1   |
| HGSC Spur_v2.0 assembly (gencode result) | Scaffold_v2_23980_gencode_1  |
| HGSC Spur_v2.0 assembly (gencode result) | Scaffold_v2_24692_gencode_3  |
| HGSC Spur_v2.0 assembly (gencode result) | Scaffold_v2_25560_gencode_10 |
| HGSC Spur_v2.0 assembly (gencode result) | Scaffold_v2_25560_gencode_11 |
| HGSC Spur_v2.0 assembly (gencode result) | Scaffold_v2_25593_gencode_3  |
| HGSC Spur_v2.0 assembly (gencode result) | Scaffold_v2_26354_gencode_11 |
| HGSC Spur_v2.0 assembly (gencode result) | Scaffold_v2_26354_gencode_12 |
| HGSC Spur_v2.0 assembly (gencode result) | Scaffold_v2_26363_gencode_6  |
| HGSC Spur_v2.0 assembly (gencode result) | Scaffold_v2_26382_gencode_1  |
| HGSC Spur_v2.0 assembly (gencode result) | Scaffold_v2_26382_gencode_2  |
| HGSC Spur_v2.0 assembly (gencode result) | Scaffold_v2_26993_gencode_1  |
| HGSC Spur_v2.0 assembly (gencode result) | Scaffold_v2_27018_gencode_1  |
| HGSC Spur_v2.0 assembly (gencode result) | Scaffold_v2_28746_gencode_1  |
| HGSC Spur_v2.0 assembly (gencode result) | Scaffold_v2_28746_gencode_3  |
| HGSC Spur_v2.0 assembly (gencode result) | Scaffold_v2_28746_gencode_5  |
| HGSC Spur_v2.0 assembly (gencode result) | Scaffold_v2_28746_gencode_7  |
| HGSC Spur_v2.0 assembly (gencode result) | Scaffold_v2_28754_gencode_3  |
| HGSC Spur_v2.0 assembly (gencode result) | Scaffold_v2_28833_gencode_1  |
| HGSC Spur_v2.0 assembly (gencode result) | Scaffold_v2_30645_gencode_2  |
| HGSC Spur_v2.0 assembly (gencode result) | Scaffold_v2_32372_gencode_2  |
| HGSC Spur_v2.0 assembly (gencode result) | Scaffold_v2_32421_gencode_1  |
| HGSC Spur_v2.0 assembly (gencode result) | Scaffold_v2_33267_gencode_1  |
| HGSC Spur_v2.0 assembly (gencode result) | Scaffold_v2_3400_gencode_1   |
| HGSC Spur_v2.0 assembly (gencode result) | Scaffold_v2_3400_gencode_9   |
| HGSC Spur_v2.0 assembly (gencode result) | Scaffold_v2_3400_gencode_10  |
| HGSC Spur_v2.0 assembly (gencode result) | Scaffold_v2_3400_gencode_11  |
| HGSC Spur_v2.0 assembly (gencode result) | Scaffold_v2_3400_gencode_12  |
| HGSC Spur_v2.0 assembly (gencode result) | Scaffold_v2_3400_gencode_13  |
| HGSC Spur_v2.0 assembly (gencode result) | Scaffold_v2_3400_gencode_15  |
| HGSC Spur_v2.0 assembly (gencode result) | Scaffold_v2_3400_gencode_21  |
| HGSC Spur_v2.0 assembly (gencode result) | Scaffold_v2_3400_gencode_24  |
| HGSC Spur_v2.0 assembly (gencode result) | Scaffold_v2_34023_gencode_50 |
| HGSC Spur_v2.0 assembly (gencode result) | Scaffold_v2_34023_gencode_52 |
| HGSC Spur_v2.0 assembly (gencode result) | Scaffold_v2_3407_gencode_5   |
| HGSC Spur_v2.0 assembly (gencode result) | Scaffold_v2_3407_gencode_9   |
| HGSC Spur_v2.0 assembly (gencode result) | Scaffold_v2_34693_gencode_25 |
| HGSC Spur_v2.0 assembly (gencode result) | Scaffold_v2_35416_gencode_7  |
| HGSC Spur_v2.0 assembly (gencode result) | Scaffold_v2_35416_gencode_8  |
| HGSC Spur_v2.0 assembly (gencode result) | Scaffold_v2_35416_gencode_20 |
| HGSC Spur_v2.0 assembly (gencode result) | Scaffold_v2_35445_gencode_2  |
| HGSC Spur_v2.0 assembly (gencode result) | Scaffold_v2_35888_gencode_1  |

|                                          |                              |
|------------------------------------------|------------------------------|
| HGSC Spur_v2.0 assembly (genscan result) | Scaffold_v2_36376_genscan_3  |
| HGSC Spur_v2.0 assembly (genscan result) | Scaffold_v2_37278_genscan_2  |
| HGSC Spur_v2.0 assembly (genscan result) | Scaffold_v2_38348_genscan_2  |
| HGSC Spur_v2.0 assembly (genscan result) | Scaffold_v2_40154_genscan_1  |
| HGSC Spur_v2.0 assembly (genscan result) | Scaffold_v2_40613_genscan_1  |
| HGSC Spur_v2.0 assembly (genscan result) | Scaffold_v2_40959_genscan_1  |
| HGSC Spur_v2.0 assembly (genscan result) | Scaffold_v2_41062_genscan_1  |
| HGSC Spur_v2.0 assembly (genscan result) | Scaffold_v2_41614_genscan_6  |
| HGSC Spur_v2.0 assembly (genscan result) | Scaffold_v2_41618_genscan_3  |
| HGSC Spur_v2.0 assembly (genscan result) | Scaffold_v2_41626_genscan_5  |
| HGSC Spur_v2.0 assembly (genscan result) | Scaffold_v2_42254_genscan_1  |
| HGSC Spur_v2.0 assembly (genscan result) | Scaffold_v2_42464_genscan_3  |
| HGSC Spur_v2.0 assembly (genscan result) | Scaffold_v2_42593_genscan_1  |
| HGSC Spur_v2.0 assembly (genscan result) | Scaffold_v2_43226_genscan_1  |
| HGSC Spur_v2.0 assembly (genscan result) | Scaffold_v2_4371_genscan_1   |
| HGSC Spur_v2.0 assembly (genscan result) | Scaffold_v2_44502_genscan_7  |
| HGSC Spur_v2.0 assembly (genscan result) | Scaffold_v2_45219_genscan_4  |
| HGSC Spur_v2.0 assembly (genscan result) | Scaffold_v2_45223_genscan_3  |
| HGSC Spur_v2.0 assembly (genscan result) | Scaffold_v2_46931_genscan_1  |
| HGSC Spur_v2.0 assembly (genscan result) | Scaffold_v2_47461_genscan_26 |
| HGSC Spur_v2.0 assembly (genscan result) | Scaffold_v2_47461_genscan_28 |
| HGSC Spur_v2.0 assembly (genscan result) | Scaffold_v2_47491_genscan_2  |
| HGSC Spur_v2.0 assembly (genscan result) | Scaffold_v2_48167_genscan_4  |
| HGSC Spur_v2.0 assembly (genscan result) | Scaffold_v2_48979_genscan_6  |
| HGSC Spur_v2.0 assembly (genscan result) | Scaffold_v2_4912_genscan_3   |
| HGSC Spur_v2.0 assembly (genscan result) | Scaffold_v2_4912_genscan_5   |
| HGSC Spur_v2.0 assembly (genscan result) | Scaffold_v2_4914_genscan_4   |
| HGSC Spur_v2.0 assembly (genscan result) | Scaffold_v2_50246_genscan_3  |
| HGSC Spur_v2.0 assembly (genscan result) | Scaffold_v2_51797_genscan_3  |
| HGSC Spur_v2.0 assembly (genscan result) | Scaffold_v2_52389_genscan_1  |
| HGSC Spur_v2.0 assembly (genscan result) | Scaffold_v2_52482_genscan_4  |
| HGSC Spur_v2.0 assembly (genscan result) | Scaffold_v2_52597_genscan_2  |
| HGSC Spur_v2.0 assembly (genscan result) | Scaffold_v2_53363_genscan_10 |
| HGSC Spur_v2.0 assembly (genscan result) | Scaffold_v2_53478_genscan_1  |
| HGSC Spur_v2.0 assembly (genscan result) | Scaffold_v2_54084_genscan_1  |
| HGSC Spur_v2.0 assembly (genscan result) | Scaffold_v2_54273_genscan_5  |
| HGSC Spur_v2.0 assembly (genscan result) | Scaffold_v2_54273_genscan_6  |
| HGSC Spur_v2.0 assembly (genscan result) | Scaffold_v2_55223_genscan_8  |
| HGSC Spur_v2.0 assembly (genscan result) | Scaffold_v2_5551_genscan_1   |
| HGSC Spur_v2.0 assembly (genscan result) | Scaffold_v2_55778_genscan_1  |
| HGSC Spur_v2.0 assembly (genscan result) | Scaffold_v2_56611_genscan_14 |
| HGSC Spur_v2.0 assembly (genscan result) | Scaffold_v2_56611_genscan_16 |
| HGSC Spur_v2.0 assembly (genscan result) | Scaffold_v2_57319_genscan_8  |

|                                          |                              |
|------------------------------------------|------------------------------|
| HGSC Spur_v2.0 assembly (gencode result) | Scaffold_v2_57393_gencode_4  |
| HGSC Spur_v2.0 assembly (gencode result) | Scaffold_v2_57993_gencode_1  |
| HGSC Spur_v2.0 assembly (gencode result) | Scaffold_v2_57995_gencode_3  |
| HGSC Spur_v2.0 assembly (gencode result) | Scaffold_v2_5811_gencode_5   |
| HGSC Spur_v2.0 assembly (gencode result) | Scaffold_v2_58784_gencode_4  |
| HGSC Spur_v2.0 assembly (gencode result) | Scaffold_v2_58795_gencode_6  |
| HGSC Spur_v2.0 assembly (gencode result) | Scaffold_v2_58814_gencode_4  |
| HGSC Spur_v2.0 assembly (gencode result) | Scaffold_v2_58831_gencode_2  |
| HGSC Spur_v2.0 assembly (gencode result) | Scaffold_v2_58831_gencode_6  |
| HGSC Spur_v2.0 assembly (gencode result) | Scaffold_v2_58834_gencode_1  |
| HGSC Spur_v2.0 assembly (gencode result) | Scaffold_v2_5886_gencode_1   |
| HGSC Spur_v2.0 assembly (gencode result) | Scaffold_v2_59506_gencode_1  |
| HGSC Spur_v2.0 assembly (gencode result) | Scaffold_v2_59537_gencode_1  |
| HGSC Spur_v2.0 assembly (gencode result) | Scaffold_v2_59600_gencode_2  |
| HGSC Spur_v2.0 assembly (gencode result) | Scaffold_v2_5975_gencode_4   |
| HGSC Spur_v2.0 assembly (gencode result) | Scaffold_v2_60771_gencode_1  |
| HGSC Spur_v2.0 assembly (gencode result) | Scaffold_v2_61298_gencode_8  |
| HGSC Spur_v2.0 assembly (gencode result) | Scaffold_v2_61525_gencode_1  |
| HGSC Spur_v2.0 assembly (gencode result) | Scaffold_v2_62076_gencode_8  |
| HGSC Spur_v2.0 assembly (gencode result) | Scaffold_v2_62987_gencode_1  |
| HGSC Spur_v2.0 assembly (gencode result) | Scaffold_v2_63638_gencode_1  |
| HGSC Spur_v2.0 assembly (gencode result) | Scaffold_v2_63638_gencode_6  |
| HGSC Spur_v2.0 assembly (gencode result) | Scaffold_v2_63638_gencode_22 |
| HGSC Spur_v2.0 assembly (gencode result) | Scaffold_v2_63638_gencode_25 |
| HGSC Spur_v2.0 assembly (gencode result) | Scaffold_v2_63638_gencode_26 |
| HGSC Spur_v2.0 assembly (gencode result) | Scaffold_v2_6416_gencode_11  |
| HGSC Spur_v2.0 assembly (gencode result) | Scaffold_v2_6451_gencode_1   |
| HGSC Spur_v2.0 assembly (gencode result) | Scaffold_v2_64559_gencode_2  |
| HGSC Spur_v2.0 assembly (gencode result) | Scaffold_v2_64564_gencode_1  |
| HGSC Spur_v2.0 assembly (gencode result) | Scaffold_v2_6465_gencode_1   |
| HGSC Spur_v2.0 assembly (gencode result) | Scaffold_v2_6488_gencode_2   |
| HGSC Spur_v2.0 assembly (gencode result) | Scaffold_v2_65202_gencode_1  |
| HGSC Spur_v2.0 assembly (gencode result) | Scaffold_v2_67435_gencode_1  |
| HGSC Spur_v2.0 assembly (gencode result) | Scaffold_v2_67840_gencode_1  |
| HGSC Spur_v2.0 assembly (gencode result) | Scaffold_v2_68_gencode_3     |
| HGSC Spur_v2.0 assembly (gencode result) | Scaffold_v2_68041_gencode_2  |
| HGSC Spur_v2.0 assembly (gencode result) | Scaffold_v2_68317_gencode_1  |
| HGSC Spur_v2.0 assembly (gencode result) | Scaffold_v2_68317_gencode_2  |
| HGSC Spur_v2.0 assembly (gencode result) | Scaffold_v2_68397_gencode_15 |
| HGSC Spur_v2.0 assembly (gencode result) | Scaffold_v2_70729_gencode_2  |
| HGSC Spur_v2.0 assembly (gencode result) | Scaffold_v2_71913_gencode_12 |
| HGSC Spur_v2.0 assembly (gencode result) | Scaffold_v2_71945_gencode_1  |
| HGSC Spur_v2.0 assembly (gencode result) | Scaffold_v2_74946_gencode_17 |



|                                          |                              |
|------------------------------------------|------------------------------|
| HGSC Spur_v2.0 assembly (genscan result) | Scaffold_v2_74946_genscan_18 |
| HGSC Spur_v2.0 assembly (genscan result) | Scaffold_v2_74946_genscan_19 |
| HGSC Spur_v2.0 assembly (genscan result) | Scaffold_v2_74946_genscan_20 |
| HGSC Spur_v2.0 assembly (genscan result) | Scaffold_v2_74946_genscan_22 |
| HGSC Spur_v2.0 assembly (genscan result) | Scaffold_v2_74946_genscan_23 |
| HGSC Spur_v2.0 assembly (genscan result) | Scaffold_v2_74946_genscan_24 |
| HGSC Spur_v2.0 assembly (genscan result) | Scaffold_v2_74946_genscan_29 |
| HGSC Spur_v2.0 assembly (genscan result) | Scaffold_v2_74946_genscan_31 |
| HGSC Spur_v2.0 assembly (genscan result) | Scaffold_v2_75062_genscan_1  |
| HGSC Spur_v2.0 assembly (genscan result) | Scaffold_v2_75802_genscan_2  |
| HGSC Spur_v2.0 assembly (genscan result) | Scaffold_v2_75802_genscan_5  |
| HGSC Spur_v2.0 assembly (genscan result) | Scaffold_v2_76986_genscan_2  |
| HGSC Spur_v2.0 assembly (genscan result) | Scaffold_v2_78130_genscan_1  |
| HGSC Spur_v2.0 assembly (genscan result) | Scaffold_v2_79447_genscan_2  |
| HGSC Spur_v2.0 assembly (genscan result) | Scaffold_v2_80295_genscan_2  |
| HGSC Spur_v2.0 assembly (genscan result) | Scaffold_v2_80669_genscan_1  |
| HGSC Spur_v2.0 assembly (genscan result) | Scaffold_v2_8113_genscan_1   |
| HGSC Spur_v2.0 assembly (genscan result) | Scaffold_v2_81714_genscan_3  |
| HGSC Spur_v2.0 assembly (genscan result) | Scaffold_v2_81725_genscan_8  |
| HGSC Spur_v2.0 assembly (genscan result) | Scaffold_v2_81778_genscan_1  |
| HGSC Spur_v2.0 assembly (genscan result) | Scaffold_v2_81826_genscan_2  |
| HGSC Spur_v2.0 assembly (genscan result) | Scaffold_v2_82277_genscan_2  |
| HGSC Spur_v2.0 assembly (genscan result) | Scaffold_v2_82277_genscan_3  |
| HGSC Spur_v2.0 assembly (genscan result) | Scaffold_v2_83189_genscan_1  |
| HGSC Spur_v2.0 assembly (genscan result) | Scaffold_v2_83307_genscan_1  |
| HGSC Spur_v2.0 assembly (genscan result) | Scaffold_v2_83337_genscan_1  |
| HGSC Spur_v2.0 assembly (genscan result) | Scaffold_v2_83907_genscan_9  |
| HGSC Spur_v2.0 assembly (genscan result) | Scaffold_v2_84556_genscan_1  |
| HGSC Spur_v2.0 assembly (genscan result) | Scaffold_v2_85337_genscan_10 |
| HGSC Spur_v2.0 assembly (genscan result) | Scaffold_v2_86602_genscan_1  |
| HGSC Spur_v2.0 assembly (genscan result) | Scaffold_v2_87793_genscan_1  |
| HGSC Spur_v2.0 assembly (genscan result) | Scaffold_v2_87793_genscan_36 |
| HGSC Spur_v2.0 assembly (genscan result) | Scaffold_v2_87804_genscan_2  |
| HGSC Spur_v2.0 assembly (genscan result) | Scaffold_v2_87804_genscan_8  |
| HGSC Spur_v2.0 assembly (genscan result) | Scaffold_v2_88473_genscan_1  |
| HGSC Spur_v2.0 assembly (genscan result) | Scaffold_v2_88598_genscan_2  |
| HGSC Spur_v2.0 assembly (genscan result) | Scaffold_v2_89526_genscan_2  |
| HGSC Spur_v2.0 assembly (genscan result) | Scaffold_v2_89526_genscan_1  |
| HGSC Spur_v2.0 assembly (genscan result) | Scaffold_v2_8987_genscan_2   |
| HGSC Spur_v2.0 assembly (genscan result) | Scaffold_v2_92197_genscan_1  |
| HGSC Spur_v2.0 assembly (genscan result) | Scaffold_v2_96016_genscan_1  |
| HGSC Spur_v2.0 assembly (genscan result) | Scaffold_v2_38360_genscan_1  |
| HGSC Spur_v2.0 assembly (genscan result) | Scaffold_v2_46257_genscan_1  |

|                                          |                                          |                              |
|------------------------------------------|------------------------------------------|------------------------------|
|                                          | HGSC Spur_v2.0 assembly (genscan result) | Scaffold_v2_59541_genscan_12 |
|                                          | HGSC Spur_v2.0 assembly (genscan result) | Scaffold_v2_59541_genscan_13 |
|                                          | HGSC Spur_v2.0 assembly (genscan result) | Scaffold_v2_68554_genscan_1  |
|                                          | HGSC Spur_v2.0 assembly (genscan result) | Scaffold_v2_74156_genscan_4  |
| <hr/>                                    |                                          |                              |
| <i>S. purpuratus</i> (purple sea urchin) | HGSC <i>S. purpuratus</i> GLEAN3         | GLEAN3_00199                 |
|                                          | HGSC <i>S. purpuratus</i> GLEAN3         | GLEAN3_00375                 |
|                                          | HGSC <i>S. purpuratus</i> GLEAN3         | GLEAN3_00615                 |
|                                          | HGSC <i>S. purpuratus</i> GLEAN3         | GLEAN3_00870                 |
|                                          | HGSC <i>S. purpuratus</i> GLEAN3         | GLEAN3_00871                 |
|                                          | HGSC <i>S. purpuratus</i> GLEAN3         | GLEAN3_00911                 |
|                                          | HGSC <i>S. purpuratus</i> GLEAN3         | GLEAN3_01458                 |
|                                          | HGSC <i>S. purpuratus</i> GLEAN3         | GLEAN3_01650                 |
|                                          | HGSC <i>S. purpuratus</i> GLEAN3         | GLEAN3_01877                 |
|                                          | HGSC <i>S. purpuratus</i> GLEAN3         | GLEAN3_01970                 |
|                                          | HGSC <i>S. purpuratus</i> GLEAN3         | GLEAN3_01971                 |
|                                          | HGSC <i>S. purpuratus</i> GLEAN3         | GLEAN3_01993                 |
|                                          | HGSC <i>S. purpuratus</i> GLEAN3         | GLEAN3_02224                 |
|                                          | HGSC <i>S. purpuratus</i> GLEAN3         | GLEAN3_02442                 |
|                                          | HGSC <i>S. purpuratus</i> GLEAN3         | GLEAN3_02538                 |
|                                          | HGSC <i>S. purpuratus</i> GLEAN3         | GLEAN3_02803                 |
|                                          | HGSC <i>S. purpuratus</i> GLEAN3         | GLEAN3_03419                 |
|                                          | HGSC <i>S. purpuratus</i> GLEAN3         | GLEAN3_03578                 |
|                                          | HGSC <i>S. purpuratus</i> GLEAN3         | GLEAN3_03579                 |
|                                          | HGSC <i>S. purpuratus</i> GLEAN3         | GLEAN3_04139                 |
|                                          | HGSC <i>S. purpuratus</i> GLEAN3         | GLEAN3_04150                 |
|                                          | HGSC <i>S. purpuratus</i> GLEAN3         | GLEAN3_04360                 |
|                                          | HGSC <i>S. purpuratus</i> GLEAN3         | GLEAN3_04655                 |
|                                          | HGSC <i>S. purpuratus</i> GLEAN3         | GLEAN3_04792                 |
|                                          | HGSC <i>S. purpuratus</i> GLEAN3         | GLEAN3_04951                 |
|                                          | HGSC <i>S. purpuratus</i> GLEAN3         | GLEAN3_04957                 |
|                                          | HGSC <i>S. purpuratus</i> GLEAN3         | GLEAN3_05088                 |
|                                          | HGSC <i>S. purpuratus</i> GLEAN3         | GLEAN3_05148                 |
|                                          | HGSC <i>S. purpuratus</i> GLEAN3         | GLEAN3_05339                 |
|                                          | HGSC <i>S. purpuratus</i> GLEAN3         | GLEAN3_05830                 |
|                                          | HGSC <i>S. purpuratus</i> GLEAN3         | GLEAN3_05832                 |
|                                          | HGSC <i>S. purpuratus</i> GLEAN3         | GLEAN3_05950                 |
|                                          | HGSC <i>S. purpuratus</i> GLEAN3         | GLEAN3_06218                 |
|                                          | HGSC <i>S. purpuratus</i> GLEAN3         | GLEAN3_06458                 |
|                                          | HGSC <i>S. purpuratus</i> GLEAN3         | GLEAN3_06939                 |
|                                          | HGSC <i>S. purpuratus</i> GLEAN3         | GLEAN3_07342                 |
|                                          | HGSC <i>S. purpuratus</i> GLEAN3         | GLEAN3_07418                 |
|                                          | HGSC <i>S. purpuratus</i> GLEAN3         | GLEAN3_07429                 |
|                                          | HGSC <i>S. purpuratus</i> GLEAN3         | GLEAN3_07430                 |

|                                  |              |
|----------------------------------|--------------|
| HGSC <i>S. purpuratus</i> GLEAN3 | GLEAN3_07790 |
| HGSC <i>S. purpuratus</i> GLEAN3 | GLEAN3_07850 |
| HGSC <i>S. purpuratus</i> GLEAN3 | GLEAN3_07859 |
| HGSC <i>S. purpuratus</i> GLEAN3 | GLEAN3_07986 |
| HGSC <i>S. purpuratus</i> GLEAN3 | GLEAN3_08228 |
| HGSC <i>S. purpuratus</i> GLEAN3 | GLEAN3_08267 |
| HGSC <i>S. purpuratus</i> GLEAN3 | GLEAN3_08278 |
| HGSC <i>S. purpuratus</i> GLEAN3 | GLEAN3_08396 |
| HGSC <i>S. purpuratus</i> GLEAN3 | GLEAN3_08456 |
| HGSC <i>S. purpuratus</i> GLEAN3 | GLEAN3_08962 |
| HGSC <i>S. purpuratus</i> GLEAN3 | GLEAN3_08963 |
| HGSC <i>S. purpuratus</i> GLEAN3 | GLEAN3_09037 |
| HGSC <i>S. purpuratus</i> GLEAN3 | GLEAN3_09129 |
| HGSC <i>S. purpuratus</i> GLEAN3 | GLEAN3_09173 |
| HGSC <i>S. purpuratus</i> GLEAN3 | GLEAN3_09343 |
| HGSC <i>S. purpuratus</i> GLEAN3 | GLEAN3_09435 |
| HGSC <i>S. purpuratus</i> GLEAN3 | GLEAN3_09829 |
| HGSC <i>S. purpuratus</i> GLEAN3 | GLEAN3_09933 |
| HGSC <i>S. purpuratus</i> GLEAN3 | GLEAN3_10575 |
| HGSC <i>S. purpuratus</i> GLEAN3 | GLEAN3_10619 |
| HGSC <i>S. purpuratus</i> GLEAN3 | GLEAN3_10680 |
| HGSC <i>S. purpuratus</i> GLEAN3 | GLEAN3_10693 |
| HGSC <i>S. purpuratus</i> GLEAN3 | GLEAN3_10695 |
| HGSC <i>S. purpuratus</i> GLEAN3 | GLEAN3_10940 |
| HGSC <i>S. purpuratus</i> GLEAN3 | GLEAN3_11042 |
| HGSC <i>S. purpuratus</i> GLEAN3 | GLEAN3_11328 |
| HGSC <i>S. purpuratus</i> GLEAN3 | GLEAN3_11454 |
| HGSC <i>S. purpuratus</i> GLEAN3 | GLEAN3_11481 |
| HGSC <i>S. purpuratus</i> GLEAN3 | GLEAN3_11536 |
| HGSC <i>S. purpuratus</i> GLEAN3 | GLEAN3_11537 |
| HGSC <i>S. purpuratus</i> GLEAN3 | GLEAN3_11539 |
| HGSC <i>S. purpuratus</i> GLEAN3 | GLEAN3_11540 |
| HGSC <i>S. purpuratus</i> GLEAN3 | GLEAN3_11570 |
| HGSC <i>S. purpuratus</i> GLEAN3 | GLEAN3_11823 |
| HGSC <i>S. purpuratus</i> GLEAN3 | GLEAN3_11949 |
| HGSC <i>S. purpuratus</i> GLEAN3 | GLEAN3_12257 |
| HGSC <i>S. purpuratus</i> GLEAN3 | GLEAN3_12464 |
| HGSC <i>S. purpuratus</i> GLEAN3 | GLEAN3_13111 |
| HGSC <i>S. purpuratus</i> GLEAN3 | GLEAN3_13162 |
| HGSC <i>S. purpuratus</i> GLEAN3 | GLEAN3_13470 |
| HGSC <i>S. purpuratus</i> GLEAN3 | GLEAN3_13676 |
| HGSC <i>S. purpuratus</i> GLEAN3 | GLEAN3_13751 |
| HGSC <i>S. purpuratus</i> GLEAN3 | GLEAN3_13824 |

|                                  |              |
|----------------------------------|--------------|
| HGSC <i>S. purpuratus</i> GLEAN3 | GLEAN3_14041 |
| HGSC <i>S. purpuratus</i> GLEAN3 | GLEAN3_14191 |
| HGSC <i>S. purpuratus</i> GLEAN3 | GLEAN3_14266 |
| HGSC <i>S. purpuratus</i> GLEAN3 | GLEAN3_14352 |
| HGSC <i>S. purpuratus</i> GLEAN3 | GLEAN3_14926 |
| HGSC <i>S. purpuratus</i> GLEAN3 | GLEAN3_15029 |
| HGSC <i>S. purpuratus</i> GLEAN3 | GLEAN3_15066 |
| HGSC <i>S. purpuratus</i> GLEAN3 | GLEAN3_15303 |
| HGSC <i>S. purpuratus</i> GLEAN3 | GLEAN3_15533 |
| HGSC <i>S. purpuratus</i> GLEAN3 | GLEAN3_16388 |
| HGSC <i>S. purpuratus</i> GLEAN3 | GLEAN3_16438 |
| HGSC <i>S. purpuratus</i> GLEAN3 | GLEAN3_16457 |
| HGSC <i>S. purpuratus</i> GLEAN3 | GLEAN3_16501 |
| HGSC <i>S. purpuratus</i> GLEAN3 | GLEAN3_16536 |
| HGSC <i>S. purpuratus</i> GLEAN3 | GLEAN3_16554 |
| HGSC <i>S. purpuratus</i> GLEAN3 | GLEAN3_17104 |
| HGSC <i>S. purpuratus</i> GLEAN3 | GLEAN3_17180 |
| HGSC <i>S. purpuratus</i> GLEAN3 | GLEAN3_17529 |
| HGSC <i>S. purpuratus</i> GLEAN3 | GLEAN3_17530 |
| HGSC <i>S. purpuratus</i> GLEAN3 | GLEAN3_17735 |
| HGSC <i>S. purpuratus</i> GLEAN3 | GLEAN3_17794 |
| HGSC <i>S. purpuratus</i> GLEAN3 | GLEAN3_18055 |
| HGSC <i>S. purpuratus</i> GLEAN3 | GLEAN3_18100 |
| HGSC <i>S. purpuratus</i> GLEAN3 | GLEAN3_18211 |
| HGSC <i>S. purpuratus</i> GLEAN3 | GLEAN3_18212 |
| HGSC <i>S. purpuratus</i> GLEAN3 | GLEAN3_18380 |
| HGSC <i>S. purpuratus</i> GLEAN3 | GLEAN3_18409 |
| HGSC <i>S. purpuratus</i> GLEAN3 | GLEAN3_18410 |
| HGSC <i>S. purpuratus</i> GLEAN3 | GLEAN3_18519 |
| HGSC <i>S. purpuratus</i> GLEAN3 | GLEAN3_18838 |
| HGSC <i>S. purpuratus</i> GLEAN3 | GLEAN3_19309 |
| HGSC <i>S. purpuratus</i> GLEAN3 | GLEAN3_19661 |
| HGSC <i>S. purpuratus</i> GLEAN3 | GLEAN3_19834 |
| HGSC <i>S. purpuratus</i> GLEAN3 | GLEAN3_20258 |
| HGSC <i>S. purpuratus</i> GLEAN3 | GLEAN3_20259 |
| HGSC <i>S. purpuratus</i> GLEAN3 | GLEAN3_20428 |
| HGSC <i>S. purpuratus</i> GLEAN3 | GLEAN3_20472 |
| HGSC <i>S. purpuratus</i> GLEAN3 | GLEAN3_20654 |
| HGSC <i>S. purpuratus</i> GLEAN3 | GLEAN3_20996 |
| HGSC <i>S. purpuratus</i> GLEAN3 | GLEAN3_20997 |
| HGSC <i>S. purpuratus</i> GLEAN3 | GLEAN3_21075 |
| HGSC <i>S. purpuratus</i> GLEAN3 | GLEAN3_21162 |
| HGSC <i>S. purpuratus</i> GLEAN3 | GLEAN3_21225 |

|                                  |              |
|----------------------------------|--------------|
| HGSC <i>S. purpuratus</i> GLEAN3 | GLEAN3_21395 |
| HGSC <i>S. purpuratus</i> GLEAN3 | GLEAN3_21415 |
| HGSC <i>S. purpuratus</i> GLEAN3 | GLEAN3_21420 |
| HGSC <i>S. purpuratus</i> GLEAN3 | GLEAN3_21502 |
| HGSC <i>S. purpuratus</i> GLEAN3 | GLEAN3_21787 |
| HGSC <i>S. purpuratus</i> GLEAN3 | GLEAN3_21908 |
| HGSC <i>S. purpuratus</i> GLEAN3 | GLEAN3_21936 |
| HGSC <i>S. purpuratus</i> GLEAN3 | GLEAN3_22707 |
| HGSC <i>S. purpuratus</i> GLEAN3 | GLEAN3_22708 |
| HGSC <i>S. purpuratus</i> GLEAN3 | GLEAN3_22909 |
| HGSC <i>S. purpuratus</i> GLEAN3 | GLEAN3_22911 |
| HGSC <i>S. purpuratus</i> GLEAN3 | GLEAN3_23033 |
| HGSC <i>S. purpuratus</i> GLEAN3 | GLEAN3_23035 |
| HGSC <i>S. purpuratus</i> GLEAN3 | GLEAN3_23321 |
| HGSC <i>S. purpuratus</i> GLEAN3 | GLEAN3_23491 |
| HGSC <i>S. purpuratus</i> GLEAN3 | GLEAN3_24062 |
| HGSC <i>S. purpuratus</i> GLEAN3 | GLEAN3_24204 |
| HGSC <i>S. purpuratus</i> GLEAN3 | GLEAN3_24205 |
| HGSC <i>S. purpuratus</i> GLEAN3 | GLEAN3_24207 |
| HGSC <i>S. purpuratus</i> GLEAN3 | GLEAN3_24385 |
| HGSC <i>S. purpuratus</i> GLEAN3 | GLEAN3_24386 |
| HGSC <i>S. purpuratus</i> GLEAN3 | GLEAN3_24404 |
| HGSC <i>S. purpuratus</i> GLEAN3 | GLEAN3_24429 |
| HGSC <i>S. purpuratus</i> GLEAN3 | GLEAN3_24479 |
| HGSC <i>S. purpuratus</i> GLEAN3 | GLEAN3_24501 |
| HGSC <i>S. purpuratus</i> GLEAN3 | GLEAN3_24590 |
| HGSC <i>S. purpuratus</i> GLEAN3 | GLEAN3_24731 |
| HGSC <i>S. purpuratus</i> GLEAN3 | GLEAN3_24733 |
| HGSC <i>S. purpuratus</i> GLEAN3 | GLEAN3_24815 |
| HGSC <i>S. purpuratus</i> GLEAN3 | GLEAN3_24847 |
| HGSC <i>S. purpuratus</i> GLEAN3 | GLEAN3_24868 |
| HGSC <i>S. purpuratus</i> GLEAN3 | GLEAN3_24960 |
| HGSC <i>S. purpuratus</i> GLEAN3 | GLEAN3_25076 |
| HGSC <i>S. purpuratus</i> GLEAN3 | GLEAN3_25136 |
| HGSC <i>S. purpuratus</i> GLEAN3 | GLEAN3_25719 |
| HGSC <i>S. purpuratus</i> GLEAN3 | GLEAN3_26200 |
| HGSC <i>S. purpuratus</i> GLEAN3 | GLEAN3_26274 |
| HGSC <i>S. purpuratus</i> GLEAN3 | GLEAN3_27162 |
| HGSC <i>S. purpuratus</i> GLEAN3 | GLEAN3_27164 |
| HGSC <i>S. purpuratus</i> GLEAN3 | GLEAN3_27222 |
| HGSC <i>S. purpuratus</i> GLEAN3 | GLEAN3_27735 |
| HGSC <i>S. purpuratus</i> GLEAN3 | GLEAN3_27798 |
| HGSC <i>S. purpuratus</i> GLEAN3 | GLEAN3_27815 |

|                                    |                                   |                       |
|------------------------------------|-----------------------------------|-----------------------|
|                                    | HGSC <i>S. purpuratus</i> GLEAN3  | GLEAN3_28404          |
|                                    | HGSC <i>S. purpuratus</i> GLEAN3  | GLEAN3_28576          |
|                                    | HGSC <i>S. purpuratus</i> GLEAN3  | GLEAN3_28639          |
|                                    | HGSC <i>S. purpuratus</i> GLEAN3  | GLEAN3_28893          |
| <i>D. melanogaster</i> (fruit fly) | Ensembl release 38 'pep.abinitio' | GENSCAN00000000961    |
|                                    | Ensembl release 38 'pep.abinitio' | GENSCAN00000001346    |
|                                    | Ensembl release 38 'pep.abinitio' | GENSCAN00000005967    |
|                                    | Ensembl release 38 'pep.abinitio' | GENSCAN00000006330    |
|                                    | Ensembl release 38 'pep.abinitio' | GENSCAN00000006474    |
|                                    | Ensembl release 38 'pep.abinitio' | GENSCAN00000008355    |
|                                    | Ensembl release 38 'pep.abinitio' | GENSCAN00000011490    |
|                                    | Ensembl release 38 'pep.abinitio' | GENSCAN00000012092    |
|                                    | Ensembl release 38 'pep.abinitio' | GENSCAN00000015188    |
|                                    | Ensembl release 38 'pep.abinitio' | GENSCAN00000011840    |
|                                    | Ensembl release 38 'pep.abinitio' | GENSCAN00000012701    |
| <i>D. melanogaster</i> (fruit fly) | Ensembl release 38 'pep'          | CG1149-PA             |
|                                    | Ensembl release 38 'pep'          | CG18241-PA            |
|                                    | Ensembl release 38 'pep'          | CG2078-PA             |
|                                    | Ensembl release 38 'pep'          | CG5490-PB             |
|                                    | Ensembl release 38 'pep'          | CG5528-PA             |
|                                    | Ensembl release 38 'pep'          | CG6890-PA             |
|                                    | Ensembl release 38 'pep'          | CG7121-PA             |
|                                    | Ensembl release 38 'pep'          | CG7250-PA             |
|                                    | Ensembl release 38 'pep'          | CG7915-PB             |
|                                    | Ensembl release 38 'pep'          | CG8595-PA             |
|                                    | Ensembl release 38 'pep'          | CG8896-PA             |
| <i>D. melanogaster</i> (fruit fly) | NCBI                              | GI:34334903           |
|                                    | NCBI                              | GI:17136634           |
|                                    | NCBI                              | GI:9246971            |
|                                    | NCBI                              | GI:9246969            |
|                                    | NCBI                              | GI:9246967            |
|                                    | NCBI                              | GI:17648021           |
|                                    | NCBI                              | GI:9246963            |
|                                    | NCBI                              | GI:9246961            |
|                                    | NCBI                              | GI:21356407           |
|                                    | NCBI                              | GI:19921906           |
|                                    | NCBI                              | GI:67472684           |
| <i>C. elegans</i>                  | Ensembl release 38 'pep.abinitio' | GENEFINDER00000036667 |
|                                    | Ensembl release 38 'pep.abinitio' | GENEFINDER00000017849 |
| <i>C. elegans</i>                  | Ensembl release 38 'pep'          | C07F11.1              |
|                                    | Ensembl release 38 'pep'          | F13B10.1d.1           |
| <i>C. elegans</i>                  | NCBI                              | GI:71980576           |

|                                   | NCBI                                                   | GI:17553054                  |
|-----------------------------------|--------------------------------------------------------|------------------------------|
| <i>N. vectensis</i> (sea anemone) | JGI <i>N. vectensis</i> v1.0 annotation                | e_gw.141.61.1                |
|                                   | JGI <i>N. vectensis</i> v1.0 annotation                | e_gw.26.221.1                |
|                                   | JGI <i>N. vectensis</i> v1.0 annotation                | e_gw.5.187.1                 |
|                                   | JGI <i>N. vectensis</i> v1.0 annotation                | fgenes1_pg.scaffold_3000058  |
|                                   | JGI <i>N. vectensis</i> v1.0 annotation                | fgenes1_pg.scaffold_47000068 |
|                                   | JGI <i>N. vectensis</i> v1.0 annotation                | gw.141.125.1                 |
|                                   | JGI <i>N. vectensis</i> v1.0 annotation                | gw.152.108.1                 |
| <i>N. vectensis</i> (sea anemone) | JGI <i>N. vectensis</i> v1.0 assembly (genscan result) | scaffold_141_genscan_43      |
|                                   | JGI <i>N. vectensis</i> v1.0 assembly (genscan result) | scaffold_141_genscan_51      |
|                                   | JGI <i>N. vectensis</i> v1.0 assembly (genscan result) | scaffold_26_genscan_162      |
|                                   | JGI <i>N. vectensis</i> v1.0 assembly (genscan result) | scaffold_3_genscan_51        |
|                                   | JGI <i>N. vectensis</i> v1.0 assembly (genscan result) | scaffold_47_genscan_81       |
|                                   | JGI <i>N. vectensis</i> v1.0 assembly (genscan result) | scaffold_5_genscan_179       |

To get a more detailed view of TIR domain containing sequences in the selected species, different protein databases were checked and all sequences that could be confirmed by Pfam Protein Search or NCBI Conserved Domain Search under the default threshold were listed above.
