# Supplementary material for: Novel genes dramatically alter regulatory network topology in amphioxus
Source: PubMed Central journal article supplement (PMC2575513; doi:10.1186/gb-2008-9-8-r123), 2008-08-04
Supplement: gb-2008-9-8-r123-S3.pdf [file gb-2008-9-8-r123-S3.pdf]

**Additional Table 3. List of SRCR domain combinations in different genomes**

| Genome                 | SRCR Domain Containing Sequence | SRCR Domain Combinations | SRCR Partner Domains*                                                                                                                                                                                                                                                                                                                                                                                                                                                                                  |
|------------------------|---------------------------------|--------------------------|--------------------------------------------------------------------------------------------------------------------------------------------------------------------------------------------------------------------------------------------------------------------------------------------------------------------------------------------------------------------------------------------------------------------------------------------------------------------------------------------------------|
| <i>N. vectensis</i>    | 66                              | 8                        | MAM, Ldl_recept_a, CUB, EGF_CA, Trypsin, GLTT, LRR_1, ig                                                                                                                                                                                                                                                                                                                                                                                                                                               |
| <i>C. elegans</i>      | 1                               | 0                        | —————                                                                                                                                                                                                                                                                                                                                                                                                                                                                                                  |
| <i>D. melanogaster</i> | 4                               | 5                        | Lysyl_oxidase, Lectin_C, CBM_14, Ldl_recept_a, Trypsin                                                                                                                                                                                                                                                                                                                                                                                                                                                 |
| Sea urchin             | 269                             | 32                       | CUB, Exo_endo_phos, Kringle, F5_F8_type_C, EGF, GPS, 7tm_2, Sushi, Ldl_recept_b, Zona_pellucida, ShK, LRR_1, 7tm_1, Y_phosphatase, RVT_1, rve, WSC, HYR, V-set, Tim17, ig, DUF1891, HSP70, TIL, Somatomedin_B, MAM, Fibrinogen_C, PAN_1, zf-C2HC, zf-B_box, I-set, EGF_CA                                                                                                                                                                                                                              |
| Amphioxus              | 229                             | 56                       | MACPF, F5_F8_type_C, PAN_1, Lectin_C, EGF, Sushi, CUB, MAM, Kringle, Zona_pellucida, U-box, TSP_1, I-set, Arf, IF4E, PALP, Lysyl_oxidase, T4_deiodinase, Furin-like, WD40, Fz, Gal_Lectin, Pentaxin, TNF, Trefoil, fn3, GPS, PKD_channel, PSI, VWD, EGF_2, Cadherin, EGF_CA, Gram_pos_anchor, WSC, GON, Ldl_recept_a, Prion_octapep, Collagen, Fibrinogen_C, VWA, Trypsin, Neur_chan_LBD, Neur_chan_memb, PFK, Cu-oxidase_3, Chitin_synth_2, OTU, SAM_2, GCC2_GCC3, C1q, TIL, DOMON, SEA, NIDO, CBM_14 |
| Ciona                  | 5                               | 4                        | Trypsin, Lysyl_oxidase, Sushi, EGF                                                                                                                                                                                                                                                                                                                                                                                                                                                                     |
| Zebrafish              | 34                              | 6                        | Collagen, Kringle, Trypsin, Lysyl_oxidase, Ldl_recept_a, BACK                                                                                                                                                                                                                                                                                                                                                                                                                                          |
| Tetraodon              | 22                              | 5                        | Trypsin, SH3BGR, Lysyl_oxidase, EGF_CA, Collagen                                                                                                                                                                                                                                                                                                                                                                                                                                                       |
| Fugu                   | 16                              | 5                        | Kringle, Trypsin, Lysyl_oxidase, BACK, Zona_pellucida                                                                                                                                                                                                                                                                                                                                                                                                                                                  |
| Xenopus                | 25                              | 4                        | Trypsin, Kringle, Lysyl_oxidase, Collagen                                                                                                                                                                                                                                                                                                                                                                                                                                                              |
| Chicken                | 41                              | 10                       | Lysyl_oxidase, Kringle, Trypsin, CHCH, CUB, Zona_pellucida, Collagen, SEA, Ldl_recept_a, MAM                                                                                                                                                                                                                                                                                                                                                                                                           |
| Dog                    | 28                              | 10                       | Collagen, BACK, Macscav_rec, SEA, CUB, MAM, Ldl_recept_a, Trypsin, Lysyl_oxidase, ig                                                                                                                                                                                                                                                                                                                                                                                                                   |
| Mouse                  | 27                              | 12                       | Ldl_recept_a, Trypsin, Lysyl_oxidase, CUB, Zona_pellucida, Collagen, SEA, MAM, Macscav_rec, Kringle, BACK, ig                                                                                                                                                                                                                                                                                                                                                                                          |
| Human                  | 23                              | 12                       | Kazal_2, Ldl_recept_a, Trypsin, CUB, Zona_pellucida, SEA, MAM, BACK, Lysyl_oxidase, Collagen, Macscav_rec, Kringle                                                                                                                                                                                                                                                                                                                                                                                     |

\*Although SRCR domain itself was not counted in both ‘SRCR Domain Combinations’ and ‘SRCR Partner Domains’ column, tandem repeats of SRCR domains do exist in all above genomes.
