# Supplementary material for: Novel genes dramatically alter regulatory network topology in amphioxus
Source: PubMed Central journal article supplement (PMC2575513; doi:10.1186/gb-2008-9-8-r123), 2008-08-04
Supplement: gb-2008-9-8-r123-S4.pdf [file gb-2008-9-8-r123-S4.pdf]

**Additional Table 4. List of partner domains that combine with individual TIR or NACHT domains in each designated genome**

| Genome                 | TIR Domain Combinations | TIR Partner Domains                                                                                                                                                                                                                          | NACHT Domain Combinations | NACHT Partner Domains                                                                                                                                                                   |
|------------------------|-------------------------|----------------------------------------------------------------------------------------------------------------------------------------------------------------------------------------------------------------------------------------------|---------------------------|-----------------------------------------------------------------------------------------------------------------------------------------------------------------------------------------|
| <i>N. vectensis</i>    | 4                       | Death, ig, I-set, V-set                                                                                                                                                                                                                      | 3                         | DED, A2M_N, Phospholip_A2_1                                                                                                                                                             |
| <i>C. elegans</i>      | 3                       | LRR_1, SAM_1, SAM_2                                                                                                                                                                                                                          | 0                         | —————                                                                                                                                                                                   |
| <i>D. melanogaster</i> | 5                       | LRRNT, LRRCT, LRR_1, SAM_2, SAM_1                                                                                                                                                                                                            | 0                         | —————                                                                                                                                                                                   |
| Sea urchin             | 6                       | LRR_1, LRRCT, PID, SAM_2, SAM_1, Death                                                                                                                                                                                                       | 15                        | Death, GPS, 7tm_2, LRR_2, MFS_1, SRP54, Sterol_desat, Lectin_C, KH_1, EGF, EGF_2, Sulfatase, RVT_1, Fibrinogen_C, ZU5                                                                   |
| Amphioxus              | 28                      | LRR_1, LRRCT, LRRNT, EGF, HMG_box, TPR_1, TPR_2, Death, NACHT, NB-ARC, WD40, V-set, ig, I-set, DUF6, Pkinase, Pkinase_Tyr, SAM_2, SAM_1, HEAT_PBS, HEAT, CARD, Glycos_transf_1, Laminin_N, Laminin_EGF, Laminin_II, Laminin_G_2, Laminin_G_1 | 21                        | F-box, WD40, Death, LRR_1, Autophagy_N, Autophagy_C, RNA_pol_Rpc4, CARD, V-set, ig, I-set, SH3_1, SH3_2, DED, TIR, OKR_DC_1, F5_F8_type_C, Gal_Lectin, Myb_DNA-binding, zf-C3HC4, LRR_2 |
| Ciona                  | 1                       | LRR_1                                                                                                                                                                                                                                        | 0                         | —————                                                                                                                                                                                   |
| Zebrafish              | 2                       | LRR_1, Death                                                                                                                                                                                                                                 | 3                         | CARD, LRR_1, PAAD_DAPIN                                                                                                                                                                 |
| Tetraodon              | 8                       | LRR_1, LRR_2, SAM_1, SAM_2, LRRCT, Death, C2, ig                                                                                                                                                                                             | 4                         | PAAD_DAPIN, zf-C3HC4, CARD, Filament                                                                                                                                                    |
| Fugu                   | 7                       | ig, V-set, SAM_1, SAM_2, LRR_1, LRRCT, Death                                                                                                                                                                                                 | 4                         | LRR_1, Filament, CARD, PAAD_DAPIN                                                                                                                                                       |
| Xenopus                | 4                       | LRR_1, LRRCT, ig, Death                                                                                                                                                                                                                      | 3                         | LRR_1, LRR_2, CARD                                                                                                                                                                      |
| Chicken                | 7                       | LRR_1, SAM_2, SAM_1, Death, ig, I-set, V-set                                                                                                                                                                                                 | 3                         | LRR_1, PAAD_DAPIN, CARD                                                                                                                                                                 |
| Dog                    | 6                       | ig, Death, LRR_1, LRRCT, SAM_2, SAM_1                                                                                                                                                                                                        | 5                         | PAAD_DAPIN, LRR_1, CARD, Tropomodulin, LRR_2                                                                                                                                            |
| Mouse                  | 8                       | ig, LRRCT, LRR_1, Death, SAM_2, SAM_1, V-set, I-set                                                                                                                                                                                          | 5                         | LRR_1, BIR, CARD, PAAD_DAPIN, LRR_2                                                                                                                                                     |
| Human                  | 8                       | ig, V-set, I-set, LRR_1, LRRCT, Death, SAM_2, SAM_1                                                                                                                                                                                          | 4                         | PAAD_DAPIN, CARD, LRR_1, BIR                                                                                                                                                            |
