# Supplementary material for: Novel genes dramatically alter regulatory network topology in amphioxus
Source: PubMed Central journal article supplement (PMC2575513; doi:10.1186/gb-2008-9-8-r123), 2008-08-04
Supplement: gb-2008-9-8-r123-S5.pdf [file gb-2008-9-8-r123-S5.pdf]

**Additional Table 5. Verification of JGI-predicted amphioxus gene models by cDNA sequencing**

| GenBank ID | JGI Protein ID (Name)                          | Domain combination* | Size of JGI-predicted model | Region spanned by cDNA** |
|------------|------------------------------------------------|---------------------|-----------------------------|--------------------------|
| EU049585   | Brafl1_82667 (fgenesh2_pg.scaffold_114000007)  | TNFr—Caspase        | 1431bp; 476aa               | 224-1073bp               |
| EU049586   | Brafl1_82667 (fgenesh2_pg.scaffold_114000007)  | TNFr—Caspase        | 1431bp; 476aa               | 262-877bp                |
| EU049591   | Brafl1_105741 (fgenesh2_pg.scaffold_505000014) | Death—Caspase       | 1320bp; 439aa               | 210-1128bp               |
| EU049592   | Brafl1_82459 (fgenesh2_pg.scaffold_111000114)  | Death—NACHT—LRRs    | 3342bp; 1113aa              | 395-2180bp               |
| EU049593   | Brafl1_89453 (fgenesh2_pg.scaffold_187000018)  | Death—NACHT—LRRs    | 3333bp; 1110aa              | 166-1307bp               |
| EU049594   | Brafl1_89451 (fgenesh2_pg.scaffold_187000016)  | Death—NACHT—LRRs    | 3615bp; 1204aa              | 949-2708bp               |
| EU049589   | Brafl1_98233 (fgenesh2_pg.scaffold_317000043)  | DED—NACHT           | 2067bp; 688aa               | 234-1945bp               |
| EU049596   | Brafl1_68590 (fgenesh2_pg.scaffold_19000170)   | TIR—[NB-ARC]—WD40s  | 5076bp; 1691aa              | 1108-3692bp              |
| EU049587   | Brafl1_94467 (fgenesh2_pg.scaffold_253000051)  | CARD—NACHT          | 3156bp; 1051aa              | 426-1126bp               |
| EU049595   | Brafl1_92153 (fgenesh2_pg.scaffold_219000011)  | CARD—NACHT—LRRs     | 2994bp; 997aa               | 92-1843bp                |
| EU049588   | Brafl1_194931 (gw.97.227.1)                    | DED—DED—Caspase     | 1428bp; 476aa               | 195-1028bp               |
| EU049590   | Brafl1_246353 (e_gw.470.10.1)                  | Death—TIR           | 897bp; 298aa                | 210-676bp                |
| EU049584   | Brafl1_95677 (fgenesh2_pg.scaffold_272000001)  | SAM—TIR             | 1367bp; 455aa               | 346-1275bp               |
| EU049583   | Brafl1_131196 (estExt_fgenesh2_pg.C_5050026)   | TIR—SAM             | 2145bp; 714aa               | 454-1022bp               |
| EU279424   | Brafl1_244359 (e_gw.440.22.1)                  | CARD—Caspase        | 1083bp; 360aa               | 36-711bp                 |
| EU279425   | Brafl1_88143 (fgenesh2_pg.scaffold_170000017)  | TIR—Laminin         | 4041bp; 1346aa              | 425-1075bp               |

Selected JGI-predicted amphioxus gene models (including shortcut proteins) were verified by RT-PCR. Models are considered “proven” when cDNAs were recovered that spanned the domain combinations in question. Some variations between the cloned sequences and related JGI models could be the result of haplotype variation and alternative splicing.

\*Domain combinations are colored in red to illustrate the approximate region confirmed (proportion of model).

\*\*Region spanned by cDNA is an ongoing project, which includes the characterization of alternative transcripts, and will be maintained as a more thorough and updated table on our website at [61].
